# Supplementary material for: Does Cannabidiol (CBD) in Food Supplements Pose a Serious Health Risk? Consequences of the European Food Safety Authority (EFSA) Clock Stop Regarding Novel Food Authorisation
Source: MDPI journal article supplement (doi:10.3390/psychoactives2010005), 2023-03-13

## BMDS 3.0 Analysis Report

GWTX1412

For

GWTX1412 – 26 Week Oral Administration in Rats

28.07.2022 10:12:25

## Analysis Info

Analysis Name: GWTX1412

Analysis Description: C:\bmds3201\BMDS3201

Model Type: Dichotomous

Selected Models:

- Frequentist Dichotomous Hill (restricted)

Option Sets:

- Option Set #1
  - Risk Type: Extra Risk
  - BMR: 0.1
  - Confidence Level: 0.95
  - Background: Estimated

## Data

| GWTX1412 – 26 Week Oral Administration in Rats |                             |                                      |
|------------------------------------------------|-----------------------------|--------------------------------------|
| Source: FDA (2018)                             |                             |                                      |
| CBD Dose                                       | N                           | Incidence                            |
| mg/kg<br>bw/day                                | males + females<br>combined | Liver (centrilobular<br>hypertrophy) |
| 0                                              | 29                          | 0                                    |
| 15                                             | 30                          | 0                                    |
| 50                                             | 29                          | 19                                   |
| 150                                            | 30                          | 28                                   |

## Frequentist Dichotomous Hill Restricted Option Set #1

| User Input   |                                         |                  |            |                         |                                   |
|--------------|-----------------------------------------|------------------|------------|-------------------------|-----------------------------------|
| Info         |                                         | Model Options    |            | Model Data              |                                   |
| Model        | frequentist<br>Dichotomous Hill<br>v1.1 | Risk Type        | Extra Risk | Dependent Variable      | mg/kg bw/day                      |
| Dataset Name | GWTX1412                                | BMR              | 0.1        | Independent Variable    | Liver (centrilobular hypertrophy) |
| User notes   | Source: FDA (2018)                      | Confidence Level | 0.95       | Total # of Observations | 4                                 |
|              |                                         | Background       | Estimated  |                         |                                   |

| Model Results                                                                                                                                                                                                                                                                                                                                                                          |             |                  |  |                 |             |          |             |      |             |     |             |         |             |        |             |                  |             |
|----------------------------------------------------------------------------------------------------------------------------------------------------------------------------------------------------------------------------------------------------------------------------------------------------------------------------------------------------------------------------------------|-------------|------------------|--|-----------------|-------------|----------|-------------|------|-------------|-----|-------------|---------|-------------|--------|-------------|------------------|-------------|
| <table> <tr> <th colspan="2">Benchmark Dose</th></tr> <tr> <td>BMD</td><td>41.31587603</td></tr> <tr> <td>BMDL</td><td>19.73381974</td></tr> <tr> <td>BMDU</td><td>43.48675444</td></tr> <tr> <td>AIC</td><td>58.05858068</td></tr> <tr> <td>P-value</td><td>0.998871924</td></tr> <tr> <td>D.O.F.</td><td>1</td></tr> <tr> <td>Chi<sup>2</sup></td><td>1.99893E-06</td></tr> </table> |             | Benchmark Dose   |  | BMD             | 41.31587603 | BMDL     | 19.73381974 | BMDU | 43.48675444 | AIC | 58.05858068 | P-value | 0.998871924 | D.O.F. | 1           | Chi <sup>2</sup> | 1.99893E-06 |
| Benchmark Dose                                                                                                                                                                                                                                                                                                                                                                         |             |                  |  |                 |             |          |             |      |             |     |             |         |             |        |             |                  |             |
| BMD                                                                                                                                                                                                                                                                                                                                                                                    | 41.31587603 |                  |  |                 |             |          |             |      |             |     |             |         |             |        |             |                  |             |
| BMDL                                                                                                                                                                                                                                                                                                                                                                                   | 19.73381974 |                  |  |                 |             |          |             |      |             |     |             |         |             |        |             |                  |             |
| BMDU                                                                                                                                                                                                                                                                                                                                                                                   | 43.48675444 |                  |  |                 |             |          |             |      |             |     |             |         |             |        |             |                  |             |
| AIC                                                                                                                                                                                                                                                                                                                                                                                    | 58.05858068 |                  |  |                 |             |          |             |      |             |     |             |         |             |        |             |                  |             |
| P-value                                                                                                                                                                                                                                                                                                                                                                                | 0.998871924 |                  |  |                 |             |          |             |      |             |     |             |         |             |        |             |                  |             |
| D.O.F.                                                                                                                                                                                                                                                                                                                                                                                 | 1           |                  |  |                 |             |          |             |      |             |     |             |         |             |        |             |                  |             |
| Chi <sup>2</sup>                                                                                                                                                                                                                                                                                                                                                                       | 1.99893E-06 |                  |  |                 |             |          |             |      |             |     |             |         |             |        |             |                  |             |
| <table> <tr> <th colspan="2">Model Parameters</th></tr> <tr> <td># of Parameters</td><td>4</td></tr> <tr> <th>Variable</th><th>Estimate</th></tr> <tr> <td>g</td><td>2.61306E-08</td></tr> <tr> <td>v</td><td>0.933332866</td></tr> <tr> <td>a</td><td>Bounded</td></tr> <tr> <td>b</td><td>15.60450058</td></tr> </table>                                                             |             | Model Parameters |  | # of Parameters | 4           | Variable | Estimate    | g    | 2.61306E-08 | v   | 0.933332866 | a       | Bounded     | b      | 15.60450058 |                  |             |
| Model Parameters                                                                                                                                                                                                                                                                                                                                                                       |             |                  |  |                 |             |          |             |      |             |     |             |         |             |        |             |                  |             |
| # of Parameters                                                                                                                                                                                                                                                                                                                                                                        | 4           |                  |  |                 |             |          |             |      |             |     |             |         |             |        |             |                  |             |
| Variable                                                                                                                                                                                                                                                                                                                                                                               | Estimate    |                  |  |                 |             |          |             |      |             |     |             |         |             |        |             |                  |             |
| g                                                                                                                                                                                                                                                                                                                                                                                      | 2.61306E-08 |                  |  |                 |             |          |             |      |             |     |             |         |             |        |             |                  |             |
| v                                                                                                                                                                                                                                                                                                                                                                                      | 0.933332866 |                  |  |                 |             |          |             |      |             |     |             |         |             |        |             |                  |             |
| a                                                                                                                                                                                                                                                                                                                                                                                      | Bounded     |                  |  |                 |             |          |             |      |             |     |             |         |             |        |             |                  |             |
| b                                                                                                                                                                                                                                                                                                                                                                                      | 15.60450058 |                  |  |                 |             |          |             |      |             |     |             |         |             |        |             |                  |             |

| Goodness of Fit |                       |             |          |      |                 |
|-----------------|-----------------------|-------------|----------|------|-----------------|
| Dose            | Estimated Probability | Expected    | Observed | Size | Scaled Residual |
| 0               | 2.61306E-08           | 7.57789E-07 | 0        | 29   | -0.000871       |
| 15              | 4.13654E-08           | 1.24096E-06 | 0        | 30   | -0.001114       |
| 50              | 0.655173124           | 19.0000206  | 19       | 29   | -8.05E-06       |
| 150             | 0.933332854           | 27.99998561 | 28       | 30   | 1.054E-05       |

| Analysis of Deviance |                |                 |            |           |           |
|----------------------|----------------|-----------------|------------|-----------|-----------|
| Model                | Log Likelihood | # of Parameters | Deviance   | Test d.f. | P Value   |
| Full Model           | -26.02928834   | 4               | -          | -         | NA        |
| Fitted Model         | -26.02929034   | 3               | 3.9975E-06 | 1         | 0.9984047 |
| Reduced Model        | -79.33357714   | 1               | 106.608578 | 3         | <0.0001   |

Frequentist Dichotomous Hill Model with BMR of 10% Extra Risk for the BMD and 0.95 Lower Confidence Limit for the BMDL

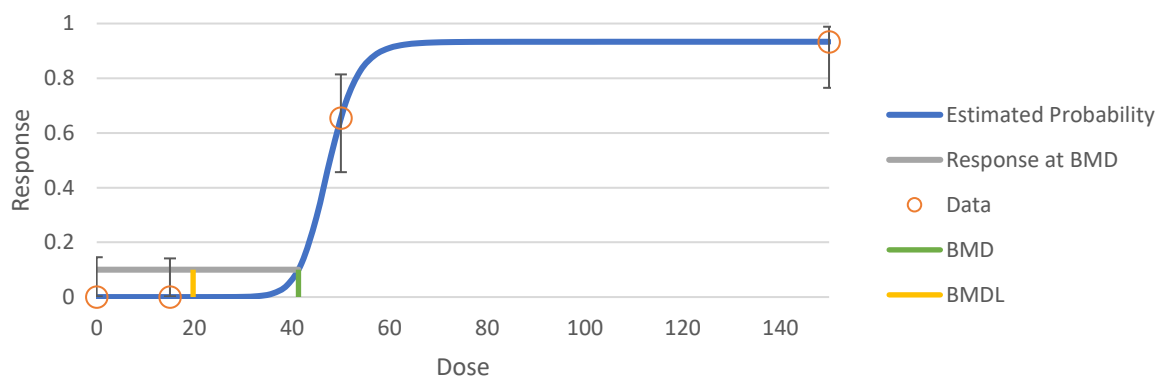

# Summary of Results

| Option set #1 (Hover for details) |               |             |            |          |          |           |           |             |                                        |                      |                           |
|-----------------------------------|---------------|-------------|------------|----------|----------|-----------|-----------|-------------|----------------------------------------|----------------------|---------------------------|
| Model                             | Analysis Type | Restriction | RiskType   | BMD      | BMDL     | BMDU      | P Value   | AIC         | Unnormalized Log Posterior Probability | BMDS Recommendation  | BMDS Recommendation Notes |
| <a href="#">Dichotomous Hill*</a> | frequentist   | Restricted  | Extra Risk | 41.31588 | 19.73382 | 43.486754 | 0.9988719 | 58.05858068 | -                                      | Viable - Recommended | Lowest AIC                |

\*Selected model in bold; scaled residuals for selected model for doses 0, 15, 50, 150 were -8.70510677218652E-04, -1.11398536497397E-03, -8.04863581109238E-06, 1.05353254517334E-05 [units], respectively.

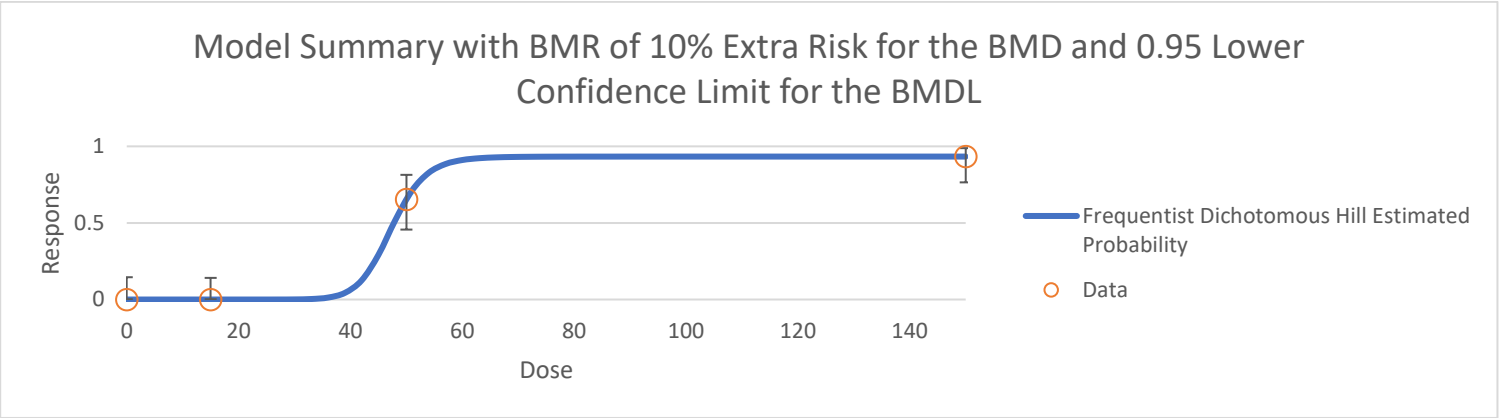

Supplement: s1 [file s1]
