# Supplementary material for: Does Cannabidiol (CBD) in Food Supplements Pose a Serious Health Risk? Consequences of the European Food Safety Authority (EFSA) Clock Stop Regarding Novel Food Authorisation
Source: MDPI journal article supplement (doi:10.3390/psychoactives2010005), 2023-03-13

Supplementary material S5 for Lachenmeier et al. (2022) Does Cannabidiol (CBD) in Food Supplements Pose a Serious Health Risk? Consequences of the EFSA Clock Stop Regarding Novel Food Authorisation

## BMDS 3.0 Analysis Report

Dziwenka et al. 2021

For

Relative liver weight – female – 90-day oral study in rats

26.08.2022 17:49:36

## Analysis Info

Analysis Name: Dziwenka et al. 2021 - Relative liver weight - female

Analysis Description: C:\bmds3201\BMDS3201

Model Type: Continuous

Selected Models:

- Frequentist Dichotomous Hill (restricted)

Option Sets:

- Option Set #1
  - BMR Type: Std. Dev.
  - BMRF: 1
  - Confidence Level: 0.95
  - Distribution: Normal
  - Variance: Constant

## Data

| Dziwenka et al. 2021 - Relative liver weight - female |        |       |           |
|-------------------------------------------------------|--------|-------|-----------|
| Source: Dziwenka et al. 2021 – S9 Table               |        |       |           |
| Dose *                                                | N      | Mean  | Std. Dev. |
| mg/kg bw/day                                          | female | %     | %         |
| 0                                                     | 10     | 2.846 | 0.209     |
| 6.3                                                   | 10     | 2.687 | 0.253     |
| 22.68                                                 | 10     | 2.915 | 0.338     |
| 81.648                                                | 9      | 3.309 | 0.189     |

\* Note: Dose levels adjusted from hemp oil extract to CBD assuming 25.2% CBD.

Adverse Direction: Automatic

## Frequentist Exponential Restricted Option Set #1

| User Input                                                                                                                                                                                                                                                                                                                                                                                                                                                                                                                                                                  |                                                          |  |       |                                             |              |                                                          |            |                       |                     |                                                      |                                                                                                                                                                                                                                                                                                                                                                                                                                                               |               |  |          |           |      |   |                  |   |                  |      |                   |        |                                                                                                                                                                                                                                                                                                                                                                                                                                                |            |  |                    |              |                      |   |                         |   |                   |           |
|-----------------------------------------------------------------------------------------------------------------------------------------------------------------------------------------------------------------------------------------------------------------------------------------------------------------------------------------------------------------------------------------------------------------------------------------------------------------------------------------------------------------------------------------------------------------------------|----------------------------------------------------------|--|-------|---------------------------------------------|--------------|----------------------------------------------------------|------------|-----------------------|---------------------|------------------------------------------------------|---------------------------------------------------------------------------------------------------------------------------------------------------------------------------------------------------------------------------------------------------------------------------------------------------------------------------------------------------------------------------------------------------------------------------------------------------------------|---------------|--|----------|-----------|------|---|------------------|---|------------------|------|-------------------|--------|------------------------------------------------------------------------------------------------------------------------------------------------------------------------------------------------------------------------------------------------------------------------------------------------------------------------------------------------------------------------------------------------------------------------------------------------|------------|--|--------------------|--------------|----------------------|---|-------------------------|---|-------------------|-----------|
| <table border="1" style="width: 100%; border-collapse: collapse;"> <thead> <tr style="background-color: #add8e6;"> <th style="width: 15%;">Info</th> <th></th> </tr> </thead> <tbody> <tr> <td>Model</td> <td>frequentist<br/>Exponential degree<br/>2 v1.1</td> </tr> <tr> <td>Dataset Name</td> <td>Dziwenka et al. 2021<br/>- Relative liver weight - female</td> </tr> <tr> <td>User notes</td> <td>[Add user notes here]</td> </tr> <tr> <td>Dose-Response Model</td> <td><math>M[\text{dose}] = a * \exp(\pm 1 * b * \text{dose})</math></td> </tr> </tbody> </table> | Info                                                     |  | Model | frequentist<br>Exponential degree<br>2 v1.1 | Dataset Name | Dziwenka et al. 2021<br>- Relative liver weight - female | User notes | [Add user notes here] | Dose-Response Model | $M[\text{dose}] = a * \exp(\pm 1 * b * \text{dose})$ | <table border="1" style="width: 100%; border-collapse: collapse;"> <thead> <tr style="background-color: #add8e6;"> <th style="width: 15%;">Model Options</th> <th></th> </tr> </thead> <tbody> <tr> <td>BMR Type</td> <td>Std. Dev.</td> </tr> <tr> <td>BMRF</td> <td>1</td> </tr> <tr> <td>Tail Probability</td> <td>-</td> </tr> <tr> <td>Confidence Level</td> <td>0.95</td> </tr> <tr> <td>Distribution Type</td> <td>Normal</td> </tr> </tbody> </table> | Model Options |  | BMR Type | Std. Dev. | BMRF | 1 | Tail Probability | - | Confidence Level | 0.95 | Distribution Type | Normal | <table border="1" style="width: 100%; border-collapse: collapse;"> <thead> <tr style="background-color: #add8e6;"> <th style="width: 15%;">Model Data</th> <th></th> </tr> </thead> <tbody> <tr> <td>Dependent Variable</td> <td>mg/kg bw/day</td> </tr> <tr> <td>Independent Variable</td> <td>%</td> </tr> <tr> <td>Total # of Observations</td> <td>4</td> </tr> <tr> <td>Adverse Direction</td> <td>Automatic</td> </tr> </tbody> </table> | Model Data |  | Dependent Variable | mg/kg bw/day | Independent Variable | % | Total # of Observations | 4 | Adverse Direction | Automatic |
| Info                                                                                                                                                                                                                                                                                                                                                                                                                                                                                                                                                                        |                                                          |  |       |                                             |              |                                                          |            |                       |                     |                                                      |                                                                                                                                                                                                                                                                                                                                                                                                                                                               |               |  |          |           |      |   |                  |   |                  |      |                   |        |                                                                                                                                                                                                                                                                                                                                                                                                                                                |            |  |                    |              |                      |   |                         |   |                   |           |
| Model                                                                                                                                                                                                                                                                                                                                                                                                                                                                                                                                                                       | frequentist<br>Exponential degree<br>2 v1.1              |  |       |                                             |              |                                                          |            |                       |                     |                                                      |                                                                                                                                                                                                                                                                                                                                                                                                                                                               |               |  |          |           |      |   |                  |   |                  |      |                   |        |                                                                                                                                                                                                                                                                                                                                                                                                                                                |            |  |                    |              |                      |   |                         |   |                   |           |
| Dataset Name                                                                                                                                                                                                                                                                                                                                                                                                                                                                                                                                                                | Dziwenka et al. 2021<br>- Relative liver weight - female |  |       |                                             |              |                                                          |            |                       |                     |                                                      |                                                                                                                                                                                                                                                                                                                                                                                                                                                               |               |  |          |           |      |   |                  |   |                  |      |                   |        |                                                                                                                                                                                                                                                                                                                                                                                                                                                |            |  |                    |              |                      |   |                         |   |                   |           |
| User notes                                                                                                                                                                                                                                                                                                                                                                                                                                                                                                                                                                  | [Add user notes here]                                    |  |       |                                             |              |                                                          |            |                       |                     |                                                      |                                                                                                                                                                                                                                                                                                                                                                                                                                                               |               |  |          |           |      |   |                  |   |                  |      |                   |        |                                                                                                                                                                                                                                                                                                                                                                                                                                                |            |  |                    |              |                      |   |                         |   |                   |           |
| Dose-Response Model                                                                                                                                                                                                                                                                                                                                                                                                                                                                                                                                                         | $M[\text{dose}] = a * \exp(\pm 1 * b * \text{dose})$     |  |       |                                             |              |                                                          |            |                       |                     |                                                      |                                                                                                                                                                                                                                                                                                                                                                                                                                                               |               |  |          |           |      |   |                  |   |                  |      |                   |        |                                                                                                                                                                                                                                                                                                                                                                                                                                                |            |  |                    |              |                      |   |                         |   |                   |           |
| Model Options                                                                                                                                                                                                                                                                                                                                                                                                                                                                                                                                                               |                                                          |  |       |                                             |              |                                                          |            |                       |                     |                                                      |                                                                                                                                                                                                                                                                                                                                                                                                                                                               |               |  |          |           |      |   |                  |   |                  |      |                   |        |                                                                                                                                                                                                                                                                                                                                                                                                                                                |            |  |                    |              |                      |   |                         |   |                   |           |
| BMR Type                                                                                                                                                                                                                                                                                                                                                                                                                                                                                                                                                                    | Std. Dev.                                                |  |       |                                             |              |                                                          |            |                       |                     |                                                      |                                                                                                                                                                                                                                                                                                                                                                                                                                                               |               |  |          |           |      |   |                  |   |                  |      |                   |        |                                                                                                                                                                                                                                                                                                                                                                                                                                                |            |  |                    |              |                      |   |                         |   |                   |           |
| BMRF                                                                                                                                                                                                                                                                                                                                                                                                                                                                                                                                                                        | 1                                                        |  |       |                                             |              |                                                          |            |                       |                     |                                                      |                                                                                                                                                                                                                                                                                                                                                                                                                                                               |               |  |          |           |      |   |                  |   |                  |      |                   |        |                                                                                                                                                                                                                                                                                                                                                                                                                                                |            |  |                    |              |                      |   |                         |   |                   |           |
| Tail Probability                                                                                                                                                                                                                                                                                                                                                                                                                                                                                                                                                            | -                                                        |  |       |                                             |              |                                                          |            |                       |                     |                                                      |                                                                                                                                                                                                                                                                                                                                                                                                                                                               |               |  |          |           |      |   |                  |   |                  |      |                   |        |                                                                                                                                                                                                                                                                                                                                                                                                                                                |            |  |                    |              |                      |   |                         |   |                   |           |
| Confidence Level                                                                                                                                                                                                                                                                                                                                                                                                                                                                                                                                                            | 0.95                                                     |  |       |                                             |              |                                                          |            |                       |                     |                                                      |                                                                                                                                                                                                                                                                                                                                                                                                                                                               |               |  |          |           |      |   |                  |   |                  |      |                   |        |                                                                                                                                                                                                                                                                                                                                                                                                                                                |            |  |                    |              |                      |   |                         |   |                   |           |
| Distribution Type                                                                                                                                                                                                                                                                                                                                                                                                                                                                                                                                                           | Normal                                                   |  |       |                                             |              |                                                          |            |                       |                     |                                                      |                                                                                                                                                                                                                                                                                                                                                                                                                                                               |               |  |          |           |      |   |                  |   |                  |      |                   |        |                                                                                                                                                                                                                                                                                                                                                                                                                                                |            |  |                    |              |                      |   |                         |   |                   |           |
| Model Data                                                                                                                                                                                                                                                                                                                                                                                                                                                                                                                                                                  |                                                          |  |       |                                             |              |                                                          |            |                       |                     |                                                      |                                                                                                                                                                                                                                                                                                                                                                                                                                                               |               |  |          |           |      |   |                  |   |                  |      |                   |        |                                                                                                                                                                                                                                                                                                                                                                                                                                                |            |  |                    |              |                      |   |                         |   |                   |           |
| Dependent Variable                                                                                                                                                                                                                                                                                                                                                                                                                                                                                                                                                          | mg/kg bw/day                                             |  |       |                                             |              |                                                          |            |                       |                     |                                                      |                                                                                                                                                                                                                                                                                                                                                                                                                                                               |               |  |          |           |      |   |                  |   |                  |      |                   |        |                                                                                                                                                                                                                                                                                                                                                                                                                                                |            |  |                    |              |                      |   |                         |   |                   |           |
| Independent Variable                                                                                                                                                                                                                                                                                                                                                                                                                                                                                                                                                        | %                                                        |  |       |                                             |              |                                                          |            |                       |                     |                                                      |                                                                                                                                                                                                                                                                                                                                                                                                                                                               |               |  |          |           |      |   |                  |   |                  |      |                   |        |                                                                                                                                                                                                                                                                                                                                                                                                                                                |            |  |                    |              |                      |   |                         |   |                   |           |
| Total # of Observations                                                                                                                                                                                                                                                                                                                                                                                                                                                                                                                                                     | 4                                                        |  |       |                                             |              |                                                          |            |                       |                     |                                                      |                                                                                                                                                                                                                                                                                                                                                                                                                                                               |               |  |          |           |      |   |                  |   |                  |      |                   |        |                                                                                                                                                                                                                                                                                                                                                                                                                                                |            |  |                    |              |                      |   |                         |   |                   |           |
| Adverse Direction                                                                                                                                                                                                                                                                                                                                                                                                                                                                                                                                                           | Automatic                                                |  |       |                                             |              |                                                          |            |                       |                     |                                                      |                                                                                                                                                                                                                                                                                                                                                                                                                                                               |               |  |          |           |      |   |                  |   |                  |      |                   |        |                                                                                                                                                                                                                                                                                                                                                                                                                                                |            |  |                    |              |                      |   |                         |   |                   |           |

| Model Results                                                                                                                                                                                                                                                                                                                                                                                                                                                                       |             |                  |  |                 |             |          |             |      |             |     |             |                |             |        |   |
|-------------------------------------------------------------------------------------------------------------------------------------------------------------------------------------------------------------------------------------------------------------------------------------------------------------------------------------------------------------------------------------------------------------------------------------------------------------------------------------|-------------|------------------|--|-----------------|-------------|----------|-------------|------|-------------|-----|-------------|----------------|-------------|--------|---|
| <table border="1" style="width: 100%; border-collapse: collapse;"> <thead> <tr style="background-color: #add8e6;"> <th colspan="2">Benchmark Dose</th> </tr> </thead> <tbody> <tr> <td>BMD</td> <td>39.38442078</td> </tr> <tr> <td>BMDL</td> <td>29.59131806</td> </tr> <tr> <td>BMDU</td> <td>59.87999972</td> </tr> <tr> <td>AIC</td> <td>9.274032748</td> </tr> <tr> <td>Test 4 P-value</td> <td>0.194112517</td> </tr> <tr> <td>D.O.F.</td> <td>2</td> </tr> </tbody> </table> |             | Benchmark Dose   |  | BMD             | 39.38442078 | BMDL     | 29.59131806 | BMDU | 59.87999972 | AIC | 9.274032748 | Test 4 P-value | 0.194112517 | D.O.F. | 2 |
| Benchmark Dose                                                                                                                                                                                                                                                                                                                                                                                                                                                                      |             |                  |  |                 |             |          |             |      |             |     |             |                |             |        |   |
| BMD                                                                                                                                                                                                                                                                                                                                                                                                                                                                                 | 39.38442078 |                  |  |                 |             |          |             |      |             |     |             |                |             |        |   |
| BMDL                                                                                                                                                                                                                                                                                                                                                                                                                                                                                | 29.59131806 |                  |  |                 |             |          |             |      |             |     |             |                |             |        |   |
| BMDU                                                                                                                                                                                                                                                                                                                                                                                                                                                                                | 59.87999972 |                  |  |                 |             |          |             |      |             |     |             |                |             |        |   |
| AIC                                                                                                                                                                                                                                                                                                                                                                                                                                                                                 | 9.274032748 |                  |  |                 |             |          |             |      |             |     |             |                |             |        |   |
| Test 4 P-value                                                                                                                                                                                                                                                                                                                                                                                                                                                                      | 0.194112517 |                  |  |                 |             |          |             |      |             |     |             |                |             |        |   |
| D.O.F.                                                                                                                                                                                                                                                                                                                                                                                                                                                                              | 2           |                  |  |                 |             |          |             |      |             |     |             |                |             |        |   |
| <table border="1" style="width: 100%; border-collapse: collapse;"> <thead> <tr style="background-color: #add8e6;"> <th colspan="2">Model Parameters</th> </tr> </thead> <tbody> <tr> <td># of Parameters</td> <td>3</td> </tr> <tr style="background-color: #d3d3d3;"> <td>Variable</td> <td>Estimate</td> </tr> <tr> <td>a</td> <td>2.756545111</td> </tr> <tr> <td>b</td> <td>0.002224073</td> </tr> </tbody> </table>                                                            |             | Model Parameters |  | # of Parameters | 3           | Variable | Estimate    | a    | 2.756545111 | b   | 0.002224073 |                |             |        |   |
| Model Parameters                                                                                                                                                                                                                                                                                                                                                                                                                                                                    |             |                  |  |                 |             |          |             |      |             |     |             |                |             |        |   |
| # of Parameters                                                                                                                                                                                                                                                                                                                                                                                                                                                                     | 3           |                  |  |                 |             |          |             |      |             |     |             |                |             |        |   |
| Variable                                                                                                                                                                                                                                                                                                                                                                                                                                                                            | Estimate    |                  |  |                 |             |          |             |      |             |     |             |                |             |        |   |
| a                                                                                                                                                                                                                                                                                                                                                                                                                                                                                   | 2.756545111 |                  |  |                 |             |          |             |      |             |     |             |                |             |        |   |
| b                                                                                                                                                                                                                                                                                                                                                                                                                                                                                   | 0.002224073 |                  |  |                 |             |          |             |      |             |     |             |                |             |        |   |
| <table border="1" style="width: 100%; border-collapse: collapse;"> <thead> <tr style="background-color: #add8e6;"> <th>Goodness of Fit</th> </tr> </thead> <tbody> <tr> <td style="height: 40px;"></td> </tr> </tbody> </table>                                                                                                                                                                                                                                                     |             | Goodness of Fit  |  |                 |             |          |             |      |             |     |             |                |             |        |   |
| Goodness of Fit                                                                                                                                                                                                                                                                                                                                                                                                                                                                     |             |                  |  |                 |             |          |             |      |             |     |             |                |             |        |   |
|                                                                                                                                                                                                                                                                                                                                                                                                                                                                                     |             |                  |  |                 |             |          |             |      |             |     |             |                |             |        |   |

| Dose   | Size | Estimated Median | Calc'd Median | Observed Mean | Estimated SD | Calc'd SD | Observed SD | Scaled Residual |
|--------|------|------------------|---------------|---------------|--------------|-----------|-------------|-----------------|
| 0      | 10   | 2.75654511       | 2.846         | 2.846         | 0.25234695   | 0.209     | 0.209       | 1.121001034     |
| 6.3    | 10   | 2.795440739      | 2.687         | 2.687         | 0.25234695   | 0.253     | 0.253       | -1.358921603    |
| 22.68  | 10   | 2.899157257      | 2.915         | 2.915         | 0.25234695   | 0.338     | 0.338       | 0.198532814     |
| 81.648 | 9    | 3.305438739      | 3.309         | 3.309         | 0.25234695   | 0.189     | 0.189       | 0.042337672     |

| Likelihoods of Interest |                 |                 |            |
|-------------------------|-----------------|-----------------|------------|
| Model                   | Log Likelihood* | # of Parameters | AIC        |
| A1                      | 0.002300929     | 5               | 9.99539814 |
| A2                      | 2.010864982     | 8               | 11.97827   |
| A3                      | 0.002300929     | 5               | 9.99539814 |
| fitted                  | -1.637016374    | 3               | 9.27403275 |
| R                       | -12.0646431     | 2               | 28.1292862 |

| Tests of Interest |                          |         |            |
|-------------------|--------------------------|---------|------------|
| Test              | -2*Log(Likelihood Ratio) | Test df | p-value    |
| 1                 | 28.15101616              | 6       | <0.0001    |
| 2                 | 4.017128106              | 3       | 0.25962053 |
| 3                 | 4.017128106              | 3       | 0.25962053 |
| 4                 | 3.278634607              | 2       | 0.19411252 |

Frequentist Exponential Degree 2 Model with BMR of 1 Std.  
Dev. for the BMD and 0.95 Lower Confidence Limit for the  
BMDL

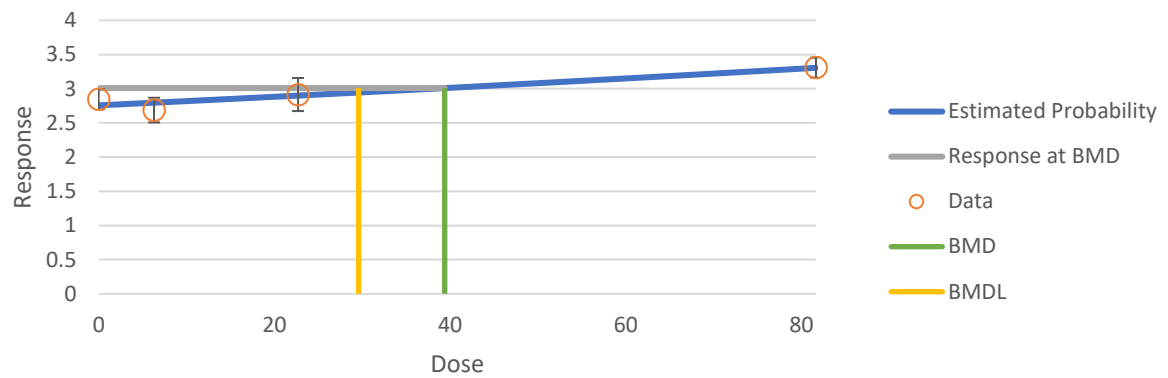

## Frequentist Exponential Restricted Option Set #1

| User Input                                                                                                                                                                                                                                                                                                                                                                                                                                                                                                                                                                              |                                                             |  |       |                                             |              |                                                             |            |                          |                     |                                                          |                                                                                                                                                                                                                                                                                                                                                                                                                                                               |               |  |          |           |      |   |                  |   |                  |      |                   |        |                                                                                                                                                                                                                                                                                                                                                                                                                                                |            |  |                    |              |                      |   |                         |   |                   |           |
|-----------------------------------------------------------------------------------------------------------------------------------------------------------------------------------------------------------------------------------------------------------------------------------------------------------------------------------------------------------------------------------------------------------------------------------------------------------------------------------------------------------------------------------------------------------------------------------------|-------------------------------------------------------------|--|-------|---------------------------------------------|--------------|-------------------------------------------------------------|------------|--------------------------|---------------------|----------------------------------------------------------|---------------------------------------------------------------------------------------------------------------------------------------------------------------------------------------------------------------------------------------------------------------------------------------------------------------------------------------------------------------------------------------------------------------------------------------------------------------|---------------|--|----------|-----------|------|---|------------------|---|------------------|------|-------------------|--------|------------------------------------------------------------------------------------------------------------------------------------------------------------------------------------------------------------------------------------------------------------------------------------------------------------------------------------------------------------------------------------------------------------------------------------------------|------------|--|--------------------|--------------|----------------------|---|-------------------------|---|-------------------|-----------|
| <table border="1" style="width: 100%; border-collapse: collapse;"> <thead> <tr style="background-color: #add8e6;"> <th style="width: 15%;">Info</th> <th></th> </tr> </thead> <tbody> <tr> <td>Model</td> <td>frequentist<br/>Exponential degree<br/>3 v1.1</td> </tr> <tr> <td>Dataset Name</td> <td>Dziwenka et al. 2021<br/>- Relative liver<br/>weight - female</td> </tr> <tr> <td>User notes</td> <td>[Add user notes<br/>here]</td> </tr> <tr> <td>Dose-Response Model</td> <td><math>M[\text{dose}] = a * \exp(\pm 1 * (b * \text{dose})^d)</math></td> </tr> </tbody> </table> | Info                                                        |  | Model | frequentist<br>Exponential degree<br>3 v1.1 | Dataset Name | Dziwenka et al. 2021<br>- Relative liver<br>weight - female | User notes | [Add user notes<br>here] | Dose-Response Model | $M[\text{dose}] = a * \exp(\pm 1 * (b * \text{dose})^d)$ | <table border="1" style="width: 100%; border-collapse: collapse;"> <thead> <tr style="background-color: #add8e6;"> <th style="width: 15%;">Model Options</th> <th></th> </tr> </thead> <tbody> <tr> <td>BMR Type</td> <td>Std. Dev.</td> </tr> <tr> <td>BMRF</td> <td>1</td> </tr> <tr> <td>Tail Probability</td> <td>-</td> </tr> <tr> <td>Confidence Level</td> <td>0.95</td> </tr> <tr> <td>Distribution Type</td> <td>Normal</td> </tr> </tbody> </table> | Model Options |  | BMR Type | Std. Dev. | BMRF | 1 | Tail Probability | - | Confidence Level | 0.95 | Distribution Type | Normal | <table border="1" style="width: 100%; border-collapse: collapse;"> <thead> <tr style="background-color: #add8e6;"> <th style="width: 15%;">Model Data</th> <th></th> </tr> </thead> <tbody> <tr> <td>Dependent Variable</td> <td>mg/kg bw/day</td> </tr> <tr> <td>Independent Variable</td> <td>%</td> </tr> <tr> <td>Total # of Observations</td> <td>4</td> </tr> <tr> <td>Adverse Direction</td> <td>Automatic</td> </tr> </tbody> </table> | Model Data |  | Dependent Variable | mg/kg bw/day | Independent Variable | % | Total # of Observations | 4 | Adverse Direction | Automatic |
| Info                                                                                                                                                                                                                                                                                                                                                                                                                                                                                                                                                                                    |                                                             |  |       |                                             |              |                                                             |            |                          |                     |                                                          |                                                                                                                                                                                                                                                                                                                                                                                                                                                               |               |  |          |           |      |   |                  |   |                  |      |                   |        |                                                                                                                                                                                                                                                                                                                                                                                                                                                |            |  |                    |              |                      |   |                         |   |                   |           |
| Model                                                                                                                                                                                                                                                                                                                                                                                                                                                                                                                                                                                   | frequentist<br>Exponential degree<br>3 v1.1                 |  |       |                                             |              |                                                             |            |                          |                     |                                                          |                                                                                                                                                                                                                                                                                                                                                                                                                                                               |               |  |          |           |      |   |                  |   |                  |      |                   |        |                                                                                                                                                                                                                                                                                                                                                                                                                                                |            |  |                    |              |                      |   |                         |   |                   |           |
| Dataset Name                                                                                                                                                                                                                                                                                                                                                                                                                                                                                                                                                                            | Dziwenka et al. 2021<br>- Relative liver<br>weight - female |  |       |                                             |              |                                                             |            |                          |                     |                                                          |                                                                                                                                                                                                                                                                                                                                                                                                                                                               |               |  |          |           |      |   |                  |   |                  |      |                   |        |                                                                                                                                                                                                                                                                                                                                                                                                                                                |            |  |                    |              |                      |   |                         |   |                   |           |
| User notes                                                                                                                                                                                                                                                                                                                                                                                                                                                                                                                                                                              | [Add user notes<br>here]                                    |  |       |                                             |              |                                                             |            |                          |                     |                                                          |                                                                                                                                                                                                                                                                                                                                                                                                                                                               |               |  |          |           |      |   |                  |   |                  |      |                   |        |                                                                                                                                                                                                                                                                                                                                                                                                                                                |            |  |                    |              |                      |   |                         |   |                   |           |
| Dose-Response Model                                                                                                                                                                                                                                                                                                                                                                                                                                                                                                                                                                     | $M[\text{dose}] = a * \exp(\pm 1 * (b * \text{dose})^d)$    |  |       |                                             |              |                                                             |            |                          |                     |                                                          |                                                                                                                                                                                                                                                                                                                                                                                                                                                               |               |  |          |           |      |   |                  |   |                  |      |                   |        |                                                                                                                                                                                                                                                                                                                                                                                                                                                |            |  |                    |              |                      |   |                         |   |                   |           |
| Model Options                                                                                                                                                                                                                                                                                                                                                                                                                                                                                                                                                                           |                                                             |  |       |                                             |              |                                                             |            |                          |                     |                                                          |                                                                                                                                                                                                                                                                                                                                                                                                                                                               |               |  |          |           |      |   |                  |   |                  |      |                   |        |                                                                                                                                                                                                                                                                                                                                                                                                                                                |            |  |                    |              |                      |   |                         |   |                   |           |
| BMR Type                                                                                                                                                                                                                                                                                                                                                                                                                                                                                                                                                                                | Std. Dev.                                                   |  |       |                                             |              |                                                             |            |                          |                     |                                                          |                                                                                                                                                                                                                                                                                                                                                                                                                                                               |               |  |          |           |      |   |                  |   |                  |      |                   |        |                                                                                                                                                                                                                                                                                                                                                                                                                                                |            |  |                    |              |                      |   |                         |   |                   |           |
| BMRF                                                                                                                                                                                                                                                                                                                                                                                                                                                                                                                                                                                    | 1                                                           |  |       |                                             |              |                                                             |            |                          |                     |                                                          |                                                                                                                                                                                                                                                                                                                                                                                                                                                               |               |  |          |           |      |   |                  |   |                  |      |                   |        |                                                                                                                                                                                                                                                                                                                                                                                                                                                |            |  |                    |              |                      |   |                         |   |                   |           |
| Tail Probability                                                                                                                                                                                                                                                                                                                                                                                                                                                                                                                                                                        | -                                                           |  |       |                                             |              |                                                             |            |                          |                     |                                                          |                                                                                                                                                                                                                                                                                                                                                                                                                                                               |               |  |          |           |      |   |                  |   |                  |      |                   |        |                                                                                                                                                                                                                                                                                                                                                                                                                                                |            |  |                    |              |                      |   |                         |   |                   |           |
| Confidence Level                                                                                                                                                                                                                                                                                                                                                                                                                                                                                                                                                                        | 0.95                                                        |  |       |                                             |              |                                                             |            |                          |                     |                                                          |                                                                                                                                                                                                                                                                                                                                                                                                                                                               |               |  |          |           |      |   |                  |   |                  |      |                   |        |                                                                                                                                                                                                                                                                                                                                                                                                                                                |            |  |                    |              |                      |   |                         |   |                   |           |
| Distribution Type                                                                                                                                                                                                                                                                                                                                                                                                                                                                                                                                                                       | Normal                                                      |  |       |                                             |              |                                                             |            |                          |                     |                                                          |                                                                                                                                                                                                                                                                                                                                                                                                                                                               |               |  |          |           |      |   |                  |   |                  |      |                   |        |                                                                                                                                                                                                                                                                                                                                                                                                                                                |            |  |                    |              |                      |   |                         |   |                   |           |
| Model Data                                                                                                                                                                                                                                                                                                                                                                                                                                                                                                                                                                              |                                                             |  |       |                                             |              |                                                             |            |                          |                     |                                                          |                                                                                                                                                                                                                                                                                                                                                                                                                                                               |               |  |          |           |      |   |                  |   |                  |      |                   |        |                                                                                                                                                                                                                                                                                                                                                                                                                                                |            |  |                    |              |                      |   |                         |   |                   |           |
| Dependent Variable                                                                                                                                                                                                                                                                                                                                                                                                                                                                                                                                                                      | mg/kg bw/day                                                |  |       |                                             |              |                                                             |            |                          |                     |                                                          |                                                                                                                                                                                                                                                                                                                                                                                                                                                               |               |  |          |           |      |   |                  |   |                  |      |                   |        |                                                                                                                                                                                                                                                                                                                                                                                                                                                |            |  |                    |              |                      |   |                         |   |                   |           |
| Independent Variable                                                                                                                                                                                                                                                                                                                                                                                                                                                                                                                                                                    | %                                                           |  |       |                                             |              |                                                             |            |                          |                     |                                                          |                                                                                                                                                                                                                                                                                                                                                                                                                                                               |               |  |          |           |      |   |                  |   |                  |      |                   |        |                                                                                                                                                                                                                                                                                                                                                                                                                                                |            |  |                    |              |                      |   |                         |   |                   |           |
| Total # of Observations                                                                                                                                                                                                                                                                                                                                                                                                                                                                                                                                                                 | 4                                                           |  |       |                                             |              |                                                             |            |                          |                     |                                                          |                                                                                                                                                                                                                                                                                                                                                                                                                                                               |               |  |          |           |      |   |                  |   |                  |      |                   |        |                                                                                                                                                                                                                                                                                                                                                                                                                                                |            |  |                    |              |                      |   |                         |   |                   |           |
| Adverse Direction                                                                                                                                                                                                                                                                                                                                                                                                                                                                                                                                                                       | Automatic                                                   |  |       |                                             |              |                                                             |            |                          |                     |                                                          |                                                                                                                                                                                                                                                                                                                                                                                                                                                               |               |  |          |           |      |   |                  |   |                  |      |                   |        |                                                                                                                                                                                                                                                                                                                                                                                                                                                |            |  |                    |              |                      |   |                         |   |                   |           |

| Model Results           |             |
|-------------------------|-------------|
| <b>Benchmark Dose</b>   |             |
| BMD                     | 46.6112829  |
| BMDL                    | 29.98277291 |
| BMDU                    | 79.35925662 |
| AIC                     | 10.99451511 |
| Test 4 P-value          | 0.083309912 |
| D.O.F.                  | 1           |
| <b>Model Parameters</b> |             |
| # of Parameters         | 4           |
| Variable                | Estimate    |
| a                       | 2.775859475 |
| b                       | 0.003135788 |
| d                       | 1.271521575 |

| Goodness of Fit |      |                  |               |               |              |           |             |                 |
|-----------------|------|------------------|---------------|---------------|--------------|-----------|-------------|-----------------|
| Dose            | Size | Estimated Median | Calc'd Median | Observed Mean | Estimated SD | Calc'd SD | Observed SD | Scaled Residual |
| 0               | 10   | 2.775859475      | 2.846         | 2.846         | 0.25144088   | 0.209     | 0.209       | 0.88213108      |
| 6.3             | 10   | 2.79481806       | 2.687         | 2.687         | 0.25144088   | 0.253     | 0.253       | -1.355987309    |
| 22.68           | 10   | 2.873861177      | 2.915         | 2.915         | 0.25144088   | 0.338     | 0.338       | 0.517387548     |
| 81.648          | 9    | 3.312889983      | 3.309         | 3.309         | 0.25144088   | 0.189     | 0.189       | -0.046412293    |

| Likelihoods of Interest |                 |                 |            |
|-------------------------|-----------------|-----------------|------------|
| Model                   | Log Likelihood* | # of Parameters | AIC        |
| A1                      | 0.002300929     | 5               | 9.99539814 |
| A2                      | 2.010864982     | 8               | 11.97827   |
| A3                      | 0.002300929     | 5               | 9.99539814 |
| fitted                  | -1.497257554    | 4               | 10.9945151 |
| R                       | -12.0646431     | 2               | 28.1292862 |

| Tests of Interest |                          |         |            |
|-------------------|--------------------------|---------|------------|
| Test              | -2*Log(Likelihood Ratio) | Test df | p-value    |
| 1                 | 28.15101616              | 6       | <0.0001    |
| 2                 | 4.017128106              | 3       | 0.25962053 |
| 3                 | 4.017128106              | 3       | 0.25962053 |
| 4                 | 2.999116966              | 1       | 0.08330991 |



Frequentist Exponential Degree 3 Model with BMR of 1 Std.  
Dev. for the BMD and 0.95 Lower Confidence Limit for the  
BMDL

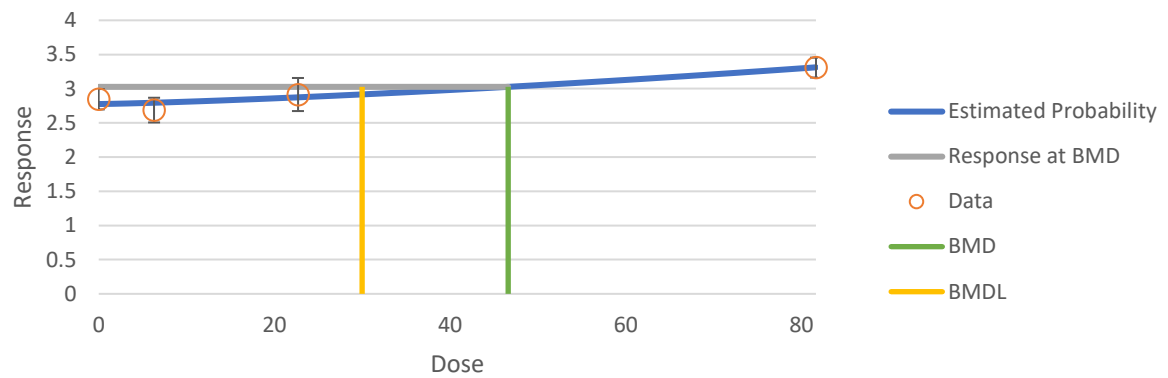

## Frequentist Exponential Restricted Option Set #1

| User Input                                                                                                                                                                                                                                                                                                                                                                                                                                                                                                                                                                                   |                                                               |  |       |                                             |              |                                                             |            |                          |                     |                                                               |                                                                                                                                                                                                                                                                                                                                                                                                                                                               |               |  |          |           |      |   |                  |   |                  |      |                   |        |                                                                                                                                                                                                                                                                                                                                                                                                                                                |            |  |                    |              |                      |   |                         |   |                   |           |
|----------------------------------------------------------------------------------------------------------------------------------------------------------------------------------------------------------------------------------------------------------------------------------------------------------------------------------------------------------------------------------------------------------------------------------------------------------------------------------------------------------------------------------------------------------------------------------------------|---------------------------------------------------------------|--|-------|---------------------------------------------|--------------|-------------------------------------------------------------|------------|--------------------------|---------------------|---------------------------------------------------------------|---------------------------------------------------------------------------------------------------------------------------------------------------------------------------------------------------------------------------------------------------------------------------------------------------------------------------------------------------------------------------------------------------------------------------------------------------------------|---------------|--|----------|-----------|------|---|------------------|---|------------------|------|-------------------|--------|------------------------------------------------------------------------------------------------------------------------------------------------------------------------------------------------------------------------------------------------------------------------------------------------------------------------------------------------------------------------------------------------------------------------------------------------|------------|--|--------------------|--------------|----------------------|---|-------------------------|---|-------------------|-----------|
| <table border="1" style="width: 100%; border-collapse: collapse;"> <thead> <tr style="background-color: #add8e6;"> <th style="width: 15%;">Info</th> <th></th> </tr> </thead> <tbody> <tr> <td>Model</td> <td>frequentist<br/>Exponential degree<br/>4 v1.1</td> </tr> <tr> <td>Dataset Name</td> <td>Dziwenka et al. 2021<br/>- Relative liver<br/>weight - female</td> </tr> <tr> <td>User notes</td> <td>[Add user notes<br/>here]</td> </tr> <tr> <td>Dose-Response Model</td> <td><math>M[\text{dose}] = a * [c - (c - 1) * \exp(-b * \text{dose})]</math></td> </tr> </tbody> </table> | Info                                                          |  | Model | frequentist<br>Exponential degree<br>4 v1.1 | Dataset Name | Dziwenka et al. 2021<br>- Relative liver<br>weight - female | User notes | [Add user notes<br>here] | Dose-Response Model | $M[\text{dose}] = a * [c - (c - 1) * \exp(-b * \text{dose})]$ | <table border="1" style="width: 100%; border-collapse: collapse;"> <thead> <tr style="background-color: #add8e6;"> <th style="width: 15%;">Model Options</th> <th></th> </tr> </thead> <tbody> <tr> <td>BMR Type</td> <td>Std. Dev.</td> </tr> <tr> <td>BMRF</td> <td>1</td> </tr> <tr> <td>Tail Probability</td> <td>-</td> </tr> <tr> <td>Confidence Level</td> <td>0.95</td> </tr> <tr> <td>Distribution Type</td> <td>Normal</td> </tr> </tbody> </table> | Model Options |  | BMR Type | Std. Dev. | BMRF | 1 | Tail Probability | - | Confidence Level | 0.95 | Distribution Type | Normal | <table border="1" style="width: 100%; border-collapse: collapse;"> <thead> <tr style="background-color: #add8e6;"> <th style="width: 15%;">Model Data</th> <th></th> </tr> </thead> <tbody> <tr> <td>Dependent Variable</td> <td>mg/kg bw/day</td> </tr> <tr> <td>Independent Variable</td> <td>%</td> </tr> <tr> <td>Total # of Observations</td> <td>4</td> </tr> <tr> <td>Adverse Direction</td> <td>Automatic</td> </tr> </tbody> </table> | Model Data |  | Dependent Variable | mg/kg bw/day | Independent Variable | % | Total # of Observations | 4 | Adverse Direction | Automatic |
| Info                                                                                                                                                                                                                                                                                                                                                                                                                                                                                                                                                                                         |                                                               |  |       |                                             |              |                                                             |            |                          |                     |                                                               |                                                                                                                                                                                                                                                                                                                                                                                                                                                               |               |  |          |           |      |   |                  |   |                  |      |                   |        |                                                                                                                                                                                                                                                                                                                                                                                                                                                |            |  |                    |              |                      |   |                         |   |                   |           |
| Model                                                                                                                                                                                                                                                                                                                                                                                                                                                                                                                                                                                        | frequentist<br>Exponential degree<br>4 v1.1                   |  |       |                                             |              |                                                             |            |                          |                     |                                                               |                                                                                                                                                                                                                                                                                                                                                                                                                                                               |               |  |          |           |      |   |                  |   |                  |      |                   |        |                                                                                                                                                                                                                                                                                                                                                                                                                                                |            |  |                    |              |                      |   |                         |   |                   |           |
| Dataset Name                                                                                                                                                                                                                                                                                                                                                                                                                                                                                                                                                                                 | Dziwenka et al. 2021<br>- Relative liver<br>weight - female   |  |       |                                             |              |                                                             |            |                          |                     |                                                               |                                                                                                                                                                                                                                                                                                                                                                                                                                                               |               |  |          |           |      |   |                  |   |                  |      |                   |        |                                                                                                                                                                                                                                                                                                                                                                                                                                                |            |  |                    |              |                      |   |                         |   |                   |           |
| User notes                                                                                                                                                                                                                                                                                                                                                                                                                                                                                                                                                                                   | [Add user notes<br>here]                                      |  |       |                                             |              |                                                             |            |                          |                     |                                                               |                                                                                                                                                                                                                                                                                                                                                                                                                                                               |               |  |          |           |      |   |                  |   |                  |      |                   |        |                                                                                                                                                                                                                                                                                                                                                                                                                                                |            |  |                    |              |                      |   |                         |   |                   |           |
| Dose-Response Model                                                                                                                                                                                                                                                                                                                                                                                                                                                                                                                                                                          | $M[\text{dose}] = a * [c - (c - 1) * \exp(-b * \text{dose})]$ |  |       |                                             |              |                                                             |            |                          |                     |                                                               |                                                                                                                                                                                                                                                                                                                                                                                                                                                               |               |  |          |           |      |   |                  |   |                  |      |                   |        |                                                                                                                                                                                                                                                                                                                                                                                                                                                |            |  |                    |              |                      |   |                         |   |                   |           |
| Model Options                                                                                                                                                                                                                                                                                                                                                                                                                                                                                                                                                                                |                                                               |  |       |                                             |              |                                                             |            |                          |                     |                                                               |                                                                                                                                                                                                                                                                                                                                                                                                                                                               |               |  |          |           |      |   |                  |   |                  |      |                   |        |                                                                                                                                                                                                                                                                                                                                                                                                                                                |            |  |                    |              |                      |   |                         |   |                   |           |
| BMR Type                                                                                                                                                                                                                                                                                                                                                                                                                                                                                                                                                                                     | Std. Dev.                                                     |  |       |                                             |              |                                                             |            |                          |                     |                                                               |                                                                                                                                                                                                                                                                                                                                                                                                                                                               |               |  |          |           |      |   |                  |   |                  |      |                   |        |                                                                                                                                                                                                                                                                                                                                                                                                                                                |            |  |                    |              |                      |   |                         |   |                   |           |
| BMRF                                                                                                                                                                                                                                                                                                                                                                                                                                                                                                                                                                                         | 1                                                             |  |       |                                             |              |                                                             |            |                          |                     |                                                               |                                                                                                                                                                                                                                                                                                                                                                                                                                                               |               |  |          |           |      |   |                  |   |                  |      |                   |        |                                                                                                                                                                                                                                                                                                                                                                                                                                                |            |  |                    |              |                      |   |                         |   |                   |           |
| Tail Probability                                                                                                                                                                                                                                                                                                                                                                                                                                                                                                                                                                             | -                                                             |  |       |                                             |              |                                                             |            |                          |                     |                                                               |                                                                                                                                                                                                                                                                                                                                                                                                                                                               |               |  |          |           |      |   |                  |   |                  |      |                   |        |                                                                                                                                                                                                                                                                                                                                                                                                                                                |            |  |                    |              |                      |   |                         |   |                   |           |
| Confidence Level                                                                                                                                                                                                                                                                                                                                                                                                                                                                                                                                                                             | 0.95                                                          |  |       |                                             |              |                                                             |            |                          |                     |                                                               |                                                                                                                                                                                                                                                                                                                                                                                                                                                               |               |  |          |           |      |   |                  |   |                  |      |                   |        |                                                                                                                                                                                                                                                                                                                                                                                                                                                |            |  |                    |              |                      |   |                         |   |                   |           |
| Distribution Type                                                                                                                                                                                                                                                                                                                                                                                                                                                                                                                                                                            | Normal                                                        |  |       |                                             |              |                                                             |            |                          |                     |                                                               |                                                                                                                                                                                                                                                                                                                                                                                                                                                               |               |  |          |           |      |   |                  |   |                  |      |                   |        |                                                                                                                                                                                                                                                                                                                                                                                                                                                |            |  |                    |              |                      |   |                         |   |                   |           |
| Model Data                                                                                                                                                                                                                                                                                                                                                                                                                                                                                                                                                                                   |                                                               |  |       |                                             |              |                                                             |            |                          |                     |                                                               |                                                                                                                                                                                                                                                                                                                                                                                                                                                               |               |  |          |           |      |   |                  |   |                  |      |                   |        |                                                                                                                                                                                                                                                                                                                                                                                                                                                |            |  |                    |              |                      |   |                         |   |                   |           |
| Dependent Variable                                                                                                                                                                                                                                                                                                                                                                                                                                                                                                                                                                           | mg/kg bw/day                                                  |  |       |                                             |              |                                                             |            |                          |                     |                                                               |                                                                                                                                                                                                                                                                                                                                                                                                                                                               |               |  |          |           |      |   |                  |   |                  |      |                   |        |                                                                                                                                                                                                                                                                                                                                                                                                                                                |            |  |                    |              |                      |   |                         |   |                   |           |
| Independent Variable                                                                                                                                                                                                                                                                                                                                                                                                                                                                                                                                                                         | %                                                             |  |       |                                             |              |                                                             |            |                          |                     |                                                               |                                                                                                                                                                                                                                                                                                                                                                                                                                                               |               |  |          |           |      |   |                  |   |                  |      |                   |        |                                                                                                                                                                                                                                                                                                                                                                                                                                                |            |  |                    |              |                      |   |                         |   |                   |           |
| Total # of Observations                                                                                                                                                                                                                                                                                                                                                                                                                                                                                                                                                                      | 4                                                             |  |       |                                             |              |                                                             |            |                          |                     |                                                               |                                                                                                                                                                                                                                                                                                                                                                                                                                                               |               |  |          |           |      |   |                  |   |                  |      |                   |        |                                                                                                                                                                                                                                                                                                                                                                                                                                                |            |  |                    |              |                      |   |                         |   |                   |           |
| Adverse Direction                                                                                                                                                                                                                                                                                                                                                                                                                                                                                                                                                                            | Automatic                                                     |  |       |                                             |              |                                                             |            |                          |                     |                                                               |                                                                                                                                                                                                                                                                                                                                                                                                                                                               |               |  |          |           |      |   |                  |   |                  |      |                   |        |                                                                                                                                                                                                                                                                                                                                                                                                                                                |            |  |                    |              |                      |   |                         |   |                   |           |

| Model Results                                                                                                                                                                                                                                                                                                                                                                                                                                                                       |             |                  |  |                 |             |          |             |      |             |     |             |                |             |        |   |
|-------------------------------------------------------------------------------------------------------------------------------------------------------------------------------------------------------------------------------------------------------------------------------------------------------------------------------------------------------------------------------------------------------------------------------------------------------------------------------------|-------------|------------------|--|-----------------|-------------|----------|-------------|------|-------------|-----|-------------|----------------|-------------|--------|---|
| <table border="1" style="width: 100%; border-collapse: collapse;"> <thead> <tr style="background-color: #add8e6;"> <th colspan="2">Benchmark Dose</th> </tr> </thead> <tbody> <tr> <td>BMD</td> <td>37.48605743</td> </tr> <tr> <td>BMDL</td> <td>27.42039566</td> </tr> <tr> <td>BMDU</td> <td>58.92192718</td> </tr> <tr> <td>AIC</td> <td>11.35409096</td> </tr> <tr> <td>Test 4 P-value</td> <td>0.066851114</td> </tr> <tr> <td>D.O.F.</td> <td>1</td> </tr> </tbody> </table> |             | Benchmark Dose   |  | BMD             | 37.48605743 | BMDL     | 27.42039566 | BMDU | 58.92192718 | AIC | 11.35409096 | Test 4 P-value | 0.066851114 | D.O.F. | 1 |
| Benchmark Dose                                                                                                                                                                                                                                                                                                                                                                                                                                                                      |             |                  |  |                 |             |          |             |      |             |     |             |                |             |        |   |
| BMD                                                                                                                                                                                                                                                                                                                                                                                                                                                                                 | 37.48605743 |                  |  |                 |             |          |             |      |             |     |             |                |             |        |   |
| BMDL                                                                                                                                                                                                                                                                                                                                                                                                                                                                                | 27.42039566 |                  |  |                 |             |          |             |      |             |     |             |                |             |        |   |
| BMDU                                                                                                                                                                                                                                                                                                                                                                                                                                                                                | 58.92192718 |                  |  |                 |             |          |             |      |             |     |             |                |             |        |   |
| AIC                                                                                                                                                                                                                                                                                                                                                                                                                                                                                 | 11.35409096 |                  |  |                 |             |          |             |      |             |     |             |                |             |        |   |
| Test 4 P-value                                                                                                                                                                                                                                                                                                                                                                                                                                                                      | 0.066851114 |                  |  |                 |             |          |             |      |             |     |             |                |             |        |   |
| D.O.F.                                                                                                                                                                                                                                                                                                                                                                                                                                                                              | 1           |                  |  |                 |             |          |             |      |             |     |             |                |             |        |   |
| <table border="1" style="width: 100%; border-collapse: collapse;"> <thead> <tr style="background-color: #add8e6;"> <th colspan="2">Model Parameters</th> </tr> </thead> <tbody> <tr> <td># of Parameters</td> <td>4</td> </tr> <tr style="background-color: #d3d3d3;"> <th>Variable</th> <th>Estimate</th> </tr> <tr> <td>a</td> <td>2.752809075</td> </tr> <tr> <td>b</td> <td>3.50875E-05</td> </tr> <tr> <td>c</td> <td>70.81117973</td> </tr> </tbody> </table>                 |             | Model Parameters |  | # of Parameters | 4           | Variable | Estimate    | a    | 2.752809075 | b   | 3.50875E-05 | c              | 70.81117973 |        |   |
| Model Parameters                                                                                                                                                                                                                                                                                                                                                                                                                                                                    |             |                  |  |                 |             |          |             |      |             |     |             |                |             |        |   |
| # of Parameters                                                                                                                                                                                                                                                                                                                                                                                                                                                                     | 4           |                  |  |                 |             |          |             |      |             |     |             |                |             |        |   |
| Variable                                                                                                                                                                                                                                                                                                                                                                                                                                                                            | Estimate    |                  |  |                 |             |          |             |      |             |     |             |                |             |        |   |
| a                                                                                                                                                                                                                                                                                                                                                                                                                                                                                   | 2.752809075 |                  |  |                 |             |          |             |      |             |     |             |                |             |        |   |
| b                                                                                                                                                                                                                                                                                                                                                                                                                                                                                   | 3.50875E-05 |                  |  |                 |             |          |             |      |             |     |             |                |             |        |   |
| c                                                                                                                                                                                                                                                                                                                                                                                                                                                                                   | 70.81117973 |                  |  |                 |             |          |             |      |             |     |             |                |             |        |   |

| Goodness of Fit |      |                  |               |               |              |           |             |                 |
|-----------------|------|------------------|---------------|---------------|--------------|-----------|-------------|-----------------|
| Dose            | Size | Estimated Median | Calc'd Median | Observed Mean | Estimated SD | Calc'd SD | Observed SD | Scaled Residual |
| 0               | 10   | 2.752809075      | 2.846         | 2.846         | 0.25260264   | 0.209     | 0.209       | 1.16663699      |
| 6.3             | 10   | 2.795285302      | 2.687         | 2.687         | 0.25260264   | 0.253     | 0.253       | -1.355600222    |
| 22.68           | 10   | 2.905679559      | 2.915         | 2.915         | 0.25260264   | 0.338     | 0.338       | 0.116680579     |
| 81.648          | 9    | 3.302573955      | 3.309         | 3.309         | 0.25260264   | 0.189     | 0.189       | 0.076318033     |

| Likelihoods of Interest |                 |                 |            |
|-------------------------|-----------------|-----------------|------------|
| Model                   | Log Likelihood* | # of Parameters | AIC        |
| A1                      | 0.002300929     | 5               | 9.99539814 |
| A2                      | 2.010864982     | 8               | 11.97827   |
| A3                      | 0.002300929     | 5               | 9.99539814 |
| fitted                  | -1.677045479    | 4               | 11.354091  |
| R                       | -12.0646431     | 2               | 28.1292862 |

| Tests of Interest |                          |         |            |
|-------------------|--------------------------|---------|------------|
| Test              | -2*Log(Likelihood Ratio) | Test df | p-value    |
| 1                 | 28.15101616              | 6       | <0.0001    |
| 2                 | 4.017128106              | 3       | 0.25962053 |
| 3                 | 4.017128106              | 3       | 0.25962053 |
| 4                 | 3.358692818              | 1       | 0.06685111 |

Frequentist Exponential Degree 4 Model with BMR of 1 Std.  
Dev. for the BMD and 0.95 Lower Confidence Limit for the  
BMDL

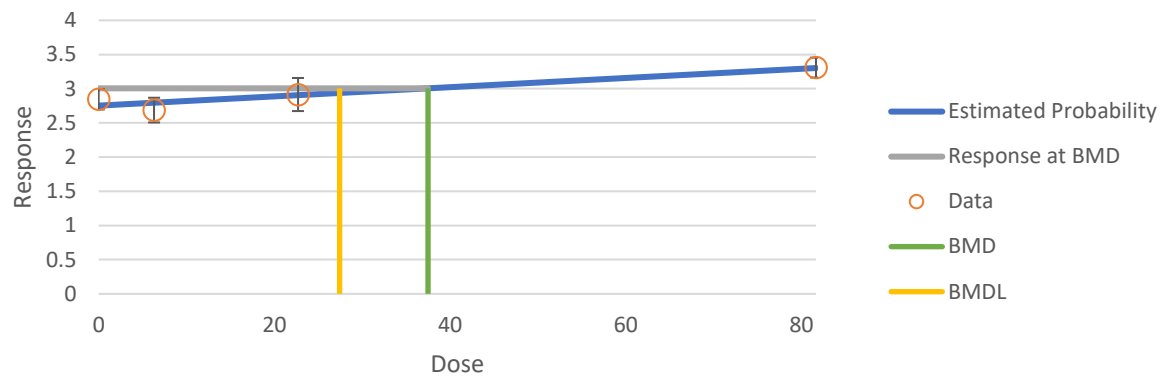

## Frequentist Exponential Restricted Option Set #1

| User Input          |                                                                   |                      |           |                         |              |
|---------------------|-------------------------------------------------------------------|----------------------|-----------|-------------------------|--------------|
| <b>Info</b>         |                                                                   | <b>Model Options</b> |           | <b>Model Data</b>       |              |
| Model               | frequentist<br>Exponential degree<br>5 v1.1                       | BMR Type             | Std. Dev. | Dependent Variable      | mg/kg bw/day |
| Dataset Name        | Dziwenka et al. 2021<br>- Relative liver weight - female          | BMRF                 | 1         | Independent Variable    | %            |
| User notes          | [Add user notes here]                                             | Tail Probability     | -         | Total # of Observations | 4            |
| Dose-Response Model | $M[\text{dose}] = a * [c - (c - 1) * \exp(-(b * \text{dose})^d)]$ | Confidence Level     | 0.95      | Adverse Direction       | Automatic    |
|                     |                                                                   | Distribution Type    | Normal    |                         |              |

| Model Results           |             |
|-------------------------|-------------|
| <b>Benchmark Dose</b>   |             |
| BMD                     | 77.23125874 |
| BMDL                    | 16.46639482 |
| BMDU                    | 80.59542402 |
| AIC                     | 14.40665766 |
| Test 4 P-value          | NA          |
| D.O.F.                  | 0           |
| <b>Model Parameters</b> |             |
| # of Parameters         | 5           |
| Variable                | Estimate    |
| a                       | 2.816009641 |
| b                       | 0.007037557 |
| c                       | 121.2505878 |
| d                       | 11.78795618 |

| Goodness of Fit |      |                  |               |               |                |           |             |                      |
|-----------------|------|------------------|---------------|---------------|----------------|-----------|-------------|----------------------|
| Dose            | Size | Estimated Median | Calc'd Median | Observed Mean | Estimated SD   | Calc'd SD | Observed SD | Scaled Residual      |
| 0               | 10   | 2.8160096<br>41  | 2.846         | 2.846         | 0.25602<br>552 | 0.209     | 0.209       | 0.370423<br>395      |
| 6.3             | 10   | 2.8160096<br>41  | 2.687         | 2.687         | 0.25602<br>552 | 0.253     | 0.253       | -<br>1.593451<br>754 |
| 22.68           | 10   | 2.8160097<br>78  | 2.915         | 2.915         | 0.25602<br>552 | 0.338     | 0.338       | 1.222669<br>414      |
| 81.648          | 9    | 3.3090007<br>25  | 3.309         | 3.309         | 0.25602<br>552 | 0.189     | 0.189       | -<br>8.49735E-<br>06 |

| Likelihoods of Interest |                 |                 |            |
|-------------------------|-----------------|-----------------|------------|
| Model                   | Log Likelihood* | # of Parameters | AIC        |
| A1                      | 0.002300929     | 5               | 9.99539814 |
| A2                      | 2.010864982     | 8               | 11.97827   |
| A3                      | 0.002300929     | 5               | 9.99539814 |
| fitted                  | -2.203328828    | 5               | 14.4066577 |
| R                       | -12.0646431     | 2               | 28.1292862 |

| Tests of Interest |                          |         |            |
|-------------------|--------------------------|---------|------------|
| Test              | -2*Log(Likelihood Ratio) | Test df | p-value    |
| 1                 | 28.15101616              | 6       | <0.0001    |
| 2                 | 4.017128106              | 3       | 0.25962053 |
| 3                 | 4.017128106              | 3       | 0.25962053 |
| 4                 | 4.411259515              | 0       | NA         |

Frequentist Exponential Degree 5 Model with BMR of 1 Std.  
Dev. for the BMD and 0.95 Lower Confidence Limit for the  
BMDL

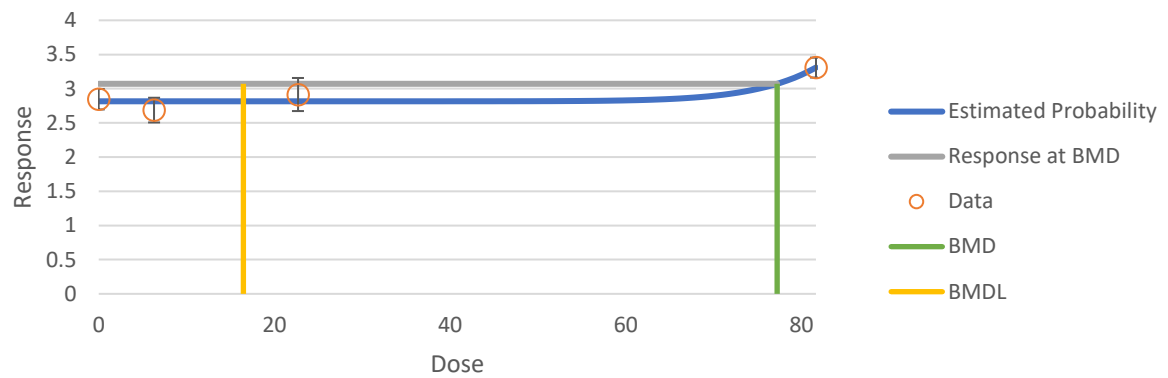

## Summary of Results

| Option set #1 (Hover for details)            |               |             |           |          |          |           |                |             |                                        |                      |                                                                                                  |
|----------------------------------------------|---------------|-------------|-----------|----------|----------|-----------|----------------|-------------|----------------------------------------|----------------------|--------------------------------------------------------------------------------------------------|
| Model                                        | Analysis Type | Restriction | RiskType  | BMD      | BMDL     | BMDU      | Test 4 P-Value | AIC         | Unnormalized Log Posterior Probability | BMDS Recommendation  | BMDS Recommendation Notes                                                                        |
| <a href="#">Exponential 2 (CV - normal)*</a> | frequentist   | Restricted  | Std. Dev. | 39.38442 | 29.59132 | 59.88     | 0.1941125      | 9.274032748 | -                                      | Viable - Recommended | Lowest AIC                                                                                       |
| <a href="#">Exponential 3 (CV - normal)</a>  | frequentist   | Restricted  | Std. Dev. | 46.61128 | 29.98277 | 79.359257 | 0.0833099      | 10.99451511 | -                                      | Questionable         | Goodness of fit p-value < 0.1                                                                    |
| <a href="#">Exponential 4 (CV - normal)</a>  | frequentist   | Restricted  | Std. Dev. | 37.48606 | 27.4204  | 58.921927 | 0.0668511      | 11.35409096 | -                                      | Questionable         | Goodness of fit p-value < 0.1                                                                    |
| <a href="#">Exponential 5 (CV - normal)</a>  | frequentist   | Restricted  | Std. Dev. | 77.23126 | 16.46639 | 80.595424 | NA             | 14.40665766 | -                                      | Questionable         | BMD/BMDL ratio > 3<br><br>d.f.=0, saturated model<br>(Goodness of fit test cannot be calculated) |

\*Constant variance case presented (BMDS Test 2 p-value = 0.259620533885501), with the selected model in bold; scaled residuals for selected model for doses 0, 6.3, 22.68, 81.648 were 1.12100103350899, -1.35892160320108, 0.198532813627268, 4.23376715859722E-02 [units], respectively.



Model Summary with BMR of 1 Std. Dev. for the BMD and 0.95 Lower  
Confidence Limit for the BMDL

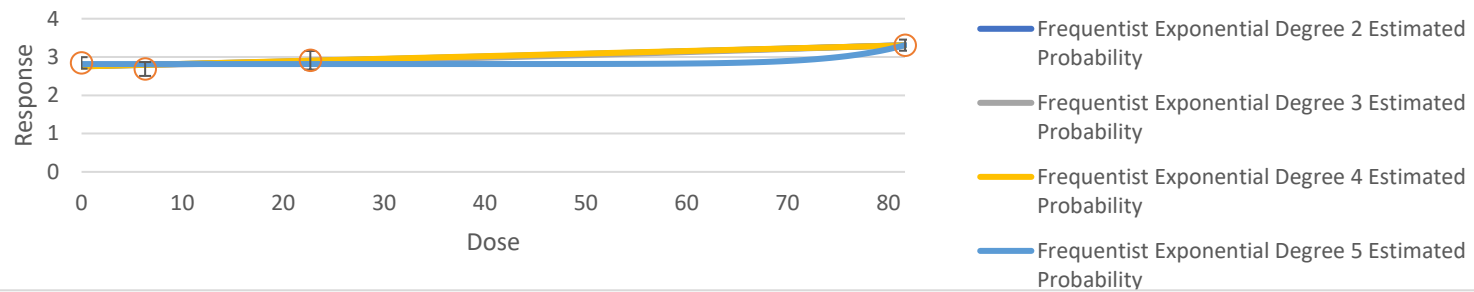

Supplement: s1 [file s1]
