# Supplementary material for: Does Cannabidiol (CBD) in Food Supplements Pose a Serious Health Risk? Consequences of the European Food Safety Authority (EFSA) Clock Stop Regarding Novel Food Authorisation
Source: MDPI journal article supplement (doi:10.3390/psychoactives2010005), 2023-03-13

## BMDS 3.0 Analysis Report

Marx et al. 2018

For

Liver weight – male – 90-day oral study in rats

18.07.2022 14:17:49

## Analysis Info

Analysis Name: Marx et al. 2018 – male

Analysis Description: C:\bmds3201\BMDS3201

Model Type: Continuous

Selected Models:

- Frequentist Dichotomous Hill (restricted)

Option Sets:

- Option Set #1
  - BMR Type: Std. Dev.
  - BMRF: 1
  - Confidence Level: 0.95
  - Distribution: Normal
  - Variance: Constant

## Data

| Marx et al. - Liver weight - male           |      |       |           |
|---------------------------------------------|------|-------|-----------|
| Source: Marx et al. 2018, Table 12, page 21 |      |       |           |
| CBD Dose *                                  | N    | Mean  | Std. Dev. |
| mg/kg bw/day                                | male | g     | g         |
| 0                                           | 10   | 9.65  | 0.95      |
| 25                                          | 10   | 9.7   | 1.04      |
| 90                                          | 10   | 11.05 | 0.79      |
| 180                                         | 10   | 13.5  | 1.37      |

\* Note: Dose levels adjusted from hemp extract to CBD assuming 26% of hemp extract are phytocannabinoids, from which 96% are CBD.

Adverse Direction: Automatic

## Frequentist Exponential Restricted Option Set #1

| User Input                                                                                                                                                                                                                                                                                                                                                                                                                                                                                                                                          |                                                      |  |       |                                             |              |                                   |            |                       |                     |                                                      |                                                                                                                                                                                                                                                                                                                                                                                                                                                               |               |  |          |           |      |   |                  |   |                  |      |                   |        |                                                                                                                                                                                                                                                                                                                                                                                                                                                |            |  |                    |              |                      |   |                         |   |                   |           |
|-----------------------------------------------------------------------------------------------------------------------------------------------------------------------------------------------------------------------------------------------------------------------------------------------------------------------------------------------------------------------------------------------------------------------------------------------------------------------------------------------------------------------------------------------------|------------------------------------------------------|--|-------|---------------------------------------------|--------------|-----------------------------------|------------|-----------------------|---------------------|------------------------------------------------------|---------------------------------------------------------------------------------------------------------------------------------------------------------------------------------------------------------------------------------------------------------------------------------------------------------------------------------------------------------------------------------------------------------------------------------------------------------------|---------------|--|----------|-----------|------|---|------------------|---|------------------|------|-------------------|--------|------------------------------------------------------------------------------------------------------------------------------------------------------------------------------------------------------------------------------------------------------------------------------------------------------------------------------------------------------------------------------------------------------------------------------------------------|------------|--|--------------------|--------------|----------------------|---|-------------------------|---|-------------------|-----------|
| <table border="1" style="width: 100%; border-collapse: collapse;"> <thead> <tr style="background-color: #a6c9ec;"> <th style="width: 15%;">Info</th> <th></th> </tr> </thead> <tbody> <tr> <td>Model</td> <td>frequentist<br/>Exponential degree<br/>2 v1.1</td> </tr> <tr> <td>Dataset Name</td> <td>Marx et al. - Liver weight - male</td> </tr> <tr> <td>User notes</td> <td>[Add user notes here]</td> </tr> <tr> <td>Dose-Response Model</td> <td><math>M[\text{dose}] = a * \exp(\pm 1 * b * \text{dose})</math></td> </tr> </tbody> </table> | Info                                                 |  | Model | frequentist<br>Exponential degree<br>2 v1.1 | Dataset Name | Marx et al. - Liver weight - male | User notes | [Add user notes here] | Dose-Response Model | $M[\text{dose}] = a * \exp(\pm 1 * b * \text{dose})$ | <table border="1" style="width: 100%; border-collapse: collapse;"> <thead> <tr style="background-color: #a6c9ec;"> <th style="width: 15%;">Model Options</th> <th></th> </tr> </thead> <tbody> <tr> <td>BMR Type</td> <td>Std. Dev.</td> </tr> <tr> <td>BMRF</td> <td>1</td> </tr> <tr> <td>Tail Probability</td> <td>-</td> </tr> <tr> <td>Confidence Level</td> <td>0.95</td> </tr> <tr> <td>Distribution Type</td> <td>Normal</td> </tr> </tbody> </table> | Model Options |  | BMR Type | Std. Dev. | BMRF | 1 | Tail Probability | - | Confidence Level | 0.95 | Distribution Type | Normal | <table border="1" style="width: 100%; border-collapse: collapse;"> <thead> <tr style="background-color: #a6c9ec;"> <th style="width: 15%;">Model Data</th> <th></th> </tr> </thead> <tbody> <tr> <td>Dependent Variable</td> <td>mg/kg bw/day</td> </tr> <tr> <td>Independent Variable</td> <td>g</td> </tr> <tr> <td>Total # of Observations</td> <td>4</td> </tr> <tr> <td>Adverse Direction</td> <td>Automatic</td> </tr> </tbody> </table> | Model Data |  | Dependent Variable | mg/kg bw/day | Independent Variable | g | Total # of Observations | 4 | Adverse Direction | Automatic |
| Info                                                                                                                                                                                                                                                                                                                                                                                                                                                                                                                                                |                                                      |  |       |                                             |              |                                   |            |                       |                     |                                                      |                                                                                                                                                                                                                                                                                                                                                                                                                                                               |               |  |          |           |      |   |                  |   |                  |      |                   |        |                                                                                                                                                                                                                                                                                                                                                                                                                                                |            |  |                    |              |                      |   |                         |   |                   |           |
| Model                                                                                                                                                                                                                                                                                                                                                                                                                                                                                                                                               | frequentist<br>Exponential degree<br>2 v1.1          |  |       |                                             |              |                                   |            |                       |                     |                                                      |                                                                                                                                                                                                                                                                                                                                                                                                                                                               |               |  |          |           |      |   |                  |   |                  |      |                   |        |                                                                                                                                                                                                                                                                                                                                                                                                                                                |            |  |                    |              |                      |   |                         |   |                   |           |
| Dataset Name                                                                                                                                                                                                                                                                                                                                                                                                                                                                                                                                        | Marx et al. - Liver weight - male                    |  |       |                                             |              |                                   |            |                       |                     |                                                      |                                                                                                                                                                                                                                                                                                                                                                                                                                                               |               |  |          |           |      |   |                  |   |                  |      |                   |        |                                                                                                                                                                                                                                                                                                                                                                                                                                                |            |  |                    |              |                      |   |                         |   |                   |           |
| User notes                                                                                                                                                                                                                                                                                                                                                                                                                                                                                                                                          | [Add user notes here]                                |  |       |                                             |              |                                   |            |                       |                     |                                                      |                                                                                                                                                                                                                                                                                                                                                                                                                                                               |               |  |          |           |      |   |                  |   |                  |      |                   |        |                                                                                                                                                                                                                                                                                                                                                                                                                                                |            |  |                    |              |                      |   |                         |   |                   |           |
| Dose-Response Model                                                                                                                                                                                                                                                                                                                                                                                                                                                                                                                                 | $M[\text{dose}] = a * \exp(\pm 1 * b * \text{dose})$ |  |       |                                             |              |                                   |            |                       |                     |                                                      |                                                                                                                                                                                                                                                                                                                                                                                                                                                               |               |  |          |           |      |   |                  |   |                  |      |                   |        |                                                                                                                                                                                                                                                                                                                                                                                                                                                |            |  |                    |              |                      |   |                         |   |                   |           |
| Model Options                                                                                                                                                                                                                                                                                                                                                                                                                                                                                                                                       |                                                      |  |       |                                             |              |                                   |            |                       |                     |                                                      |                                                                                                                                                                                                                                                                                                                                                                                                                                                               |               |  |          |           |      |   |                  |   |                  |      |                   |        |                                                                                                                                                                                                                                                                                                                                                                                                                                                |            |  |                    |              |                      |   |                         |   |                   |           |
| BMR Type                                                                                                                                                                                                                                                                                                                                                                                                                                                                                                                                            | Std. Dev.                                            |  |       |                                             |              |                                   |            |                       |                     |                                                      |                                                                                                                                                                                                                                                                                                                                                                                                                                                               |               |  |          |           |      |   |                  |   |                  |      |                   |        |                                                                                                                                                                                                                                                                                                                                                                                                                                                |            |  |                    |              |                      |   |                         |   |                   |           |
| BMRF                                                                                                                                                                                                                                                                                                                                                                                                                                                                                                                                                | 1                                                    |  |       |                                             |              |                                   |            |                       |                     |                                                      |                                                                                                                                                                                                                                                                                                                                                                                                                                                               |               |  |          |           |      |   |                  |   |                  |      |                   |        |                                                                                                                                                                                                                                                                                                                                                                                                                                                |            |  |                    |              |                      |   |                         |   |                   |           |
| Tail Probability                                                                                                                                                                                                                                                                                                                                                                                                                                                                                                                                    | -                                                    |  |       |                                             |              |                                   |            |                       |                     |                                                      |                                                                                                                                                                                                                                                                                                                                                                                                                                                               |               |  |          |           |      |   |                  |   |                  |      |                   |        |                                                                                                                                                                                                                                                                                                                                                                                                                                                |            |  |                    |              |                      |   |                         |   |                   |           |
| Confidence Level                                                                                                                                                                                                                                                                                                                                                                                                                                                                                                                                    | 0.95                                                 |  |       |                                             |              |                                   |            |                       |                     |                                                      |                                                                                                                                                                                                                                                                                                                                                                                                                                                               |               |  |          |           |      |   |                  |   |                  |      |                   |        |                                                                                                                                                                                                                                                                                                                                                                                                                                                |            |  |                    |              |                      |   |                         |   |                   |           |
| Distribution Type                                                                                                                                                                                                                                                                                                                                                                                                                                                                                                                                   | Normal                                               |  |       |                                             |              |                                   |            |                       |                     |                                                      |                                                                                                                                                                                                                                                                                                                                                                                                                                                               |               |  |          |           |      |   |                  |   |                  |      |                   |        |                                                                                                                                                                                                                                                                                                                                                                                                                                                |            |  |                    |              |                      |   |                         |   |                   |           |
| Model Data                                                                                                                                                                                                                                                                                                                                                                                                                                                                                                                                          |                                                      |  |       |                                             |              |                                   |            |                       |                     |                                                      |                                                                                                                                                                                                                                                                                                                                                                                                                                                               |               |  |          |           |      |   |                  |   |                  |      |                   |        |                                                                                                                                                                                                                                                                                                                                                                                                                                                |            |  |                    |              |                      |   |                         |   |                   |           |
| Dependent Variable                                                                                                                                                                                                                                                                                                                                                                                                                                                                                                                                  | mg/kg bw/day                                         |  |       |                                             |              |                                   |            |                       |                     |                                                      |                                                                                                                                                                                                                                                                                                                                                                                                                                                               |               |  |          |           |      |   |                  |   |                  |      |                   |        |                                                                                                                                                                                                                                                                                                                                                                                                                                                |            |  |                    |              |                      |   |                         |   |                   |           |
| Independent Variable                                                                                                                                                                                                                                                                                                                                                                                                                                                                                                                                | g                                                    |  |       |                                             |              |                                   |            |                       |                     |                                                      |                                                                                                                                                                                                                                                                                                                                                                                                                                                               |               |  |          |           |      |   |                  |   |                  |      |                   |        |                                                                                                                                                                                                                                                                                                                                                                                                                                                |            |  |                    |              |                      |   |                         |   |                   |           |
| Total # of Observations                                                                                                                                                                                                                                                                                                                                                                                                                                                                                                                             | 4                                                    |  |       |                                             |              |                                   |            |                       |                     |                                                      |                                                                                                                                                                                                                                                                                                                                                                                                                                                               |               |  |          |           |      |   |                  |   |                  |      |                   |        |                                                                                                                                                                                                                                                                                                                                                                                                                                                |            |  |                    |              |                      |   |                         |   |                   |           |
| Adverse Direction                                                                                                                                                                                                                                                                                                                                                                                                                                                                                                                                   | Automatic                                            |  |       |                                             |              |                                   |            |                       |                     |                                                      |                                                                                                                                                                                                                                                                                                                                                                                                                                                               |               |  |          |           |      |   |                  |   |                  |      |                   |        |                                                                                                                                                                                                                                                                                                                                                                                                                                                |            |  |                    |              |                      |   |                         |   |                   |           |

| Model Results                                                                                                                                                                                                                                                                                                                                                                                                                                                                      |             |                  |  |                 |             |          |             |      |             |     |             |                |            |        |   |
|------------------------------------------------------------------------------------------------------------------------------------------------------------------------------------------------------------------------------------------------------------------------------------------------------------------------------------------------------------------------------------------------------------------------------------------------------------------------------------|-------------|------------------|--|-----------------|-------------|----------|-------------|------|-------------|-----|-------------|----------------|------------|--------|---|
| <table border="1" style="width: 100%; border-collapse: collapse;"> <thead> <tr style="background-color: #a6c9ec;"> <th colspan="2">Benchmark Dose</th> </tr> </thead> <tbody> <tr> <td>BMD</td> <td>52.15398788</td> </tr> <tr> <td>BMDL</td> <td>42.58230214</td> </tr> <tr> <td>BMDU</td> <td>67.22145937</td> </tr> <tr> <td>AIC</td> <td>121.1737068</td> </tr> <tr> <td>Test 4 P-value</td> <td>0.52351281</td> </tr> <tr> <td>D.O.F.</td> <td>2</td> </tr> </tbody> </table> |             | Benchmark Dose   |  | BMD             | 52.15398788 | BMDL     | 42.58230214 | BMDU | 67.22145937 | AIC | 121.1737068 | Test 4 P-value | 0.52351281 | D.O.F. | 2 |
| Benchmark Dose                                                                                                                                                                                                                                                                                                                                                                                                                                                                     |             |                  |  |                 |             |          |             |      |             |     |             |                |            |        |   |
| BMD                                                                                                                                                                                                                                                                                                                                                                                                                                                                                | 52.15398788 |                  |  |                 |             |          |             |      |             |     |             |                |            |        |   |
| BMDL                                                                                                                                                                                                                                                                                                                                                                                                                                                                               | 42.58230214 |                  |  |                 |             |          |             |      |             |     |             |                |            |        |   |
| BMDU                                                                                                                                                                                                                                                                                                                                                                                                                                                                               | 67.22145937 |                  |  |                 |             |          |             |      |             |     |             |                |            |        |   |
| AIC                                                                                                                                                                                                                                                                                                                                                                                                                                                                                | 121.1737068 |                  |  |                 |             |          |             |      |             |     |             |                |            |        |   |
| Test 4 P-value                                                                                                                                                                                                                                                                                                                                                                                                                                                                     | 0.52351281  |                  |  |                 |             |          |             |      |             |     |             |                |            |        |   |
| D.O.F.                                                                                                                                                                                                                                                                                                                                                                                                                                                                             | 2           |                  |  |                 |             |          |             |      |             |     |             |                |            |        |   |
| <table border="1" style="width: 100%; border-collapse: collapse;"> <thead> <tr style="background-color: #a6c9ec;"> <th colspan="2">Model Parameters</th> </tr> </thead> <tbody> <tr> <td># of Parameters</td> <td>3</td> </tr> <tr style="background-color: #cccccc;"> <td>Variable</td> <td>Estimate</td> </tr> <tr> <td>a</td> <td>9.392985341</td> </tr> <tr> <td>b</td> <td>0.001978132</td> </tr> </tbody> </table>                                                           |             | Model Parameters |  | # of Parameters | 3           | Variable | Estimate    | a    | 9.392985341 | b   | 0.001978132 |                |            |        |   |
| Model Parameters                                                                                                                                                                                                                                                                                                                                                                                                                                                                   |             |                  |  |                 |             |          |             |      |             |     |             |                |            |        |   |
| # of Parameters                                                                                                                                                                                                                                                                                                                                                                                                                                                                    | 3           |                  |  |                 |             |          |             |      |             |     |             |                |            |        |   |
| Variable                                                                                                                                                                                                                                                                                                                                                                                                                                                                           | Estimate    |                  |  |                 |             |          |             |      |             |     |             |                |            |        |   |
| a                                                                                                                                                                                                                                                                                                                                                                                                                                                                                  | 9.392985341 |                  |  |                 |             |          |             |      |             |     |             |                |            |        |   |
| b                                                                                                                                                                                                                                                                                                                                                                                                                                                                                  | 0.001978132 |                  |  |                 |             |          |             |      |             |     |             |                |            |        |   |
| <table border="1" style="width: 100%; border-collapse: collapse;"> <thead> <tr style="background-color: #a6c9ec;"> <th>Goodness of Fit</th> </tr> </thead> <tbody> <tr> <td style="height: 40px;"></td> </tr> </tbody> </table>                                                                                                                                                                                                                                                    |             | Goodness of Fit  |  |                 |             |          |             |      |             |     |             |                |            |        |   |
| Goodness of Fit                                                                                                                                                                                                                                                                                                                                                                                                                                                                    |             |                  |  |                 |             |          |             |      |             |     |             |                |            |        |   |
|                                                                                                                                                                                                                                                                                                                                                                                                                                                                                    |             |                  |  |                 |             |          |             |      |             |     |             |                |            |        |   |

| Dose | Size | Estimated Median | Calc'd Median | Observed Mean | Estimated SD | Calc'd SD | Observed SD | Scaled Residual |
|------|------|------------------|---------------|---------------|--------------|-----------|-------------|-----------------|
| 0    | 10   | 9.392985341      | 9.65          | 9.65          | 1.02080265   | 0.95      | 0.95        | 0.79618888      |
| 25   | 10   | 9.869177117      | 9.7           | 9.7           | 1.02080265   | 1.04      | 1.04        | -0.524082712    |
| 90   | 10   | 11.22333483      | 11.05         | 11.05         | 1.02080265   | 0.79      | 0.79        | -0.536962602    |
| 180  | 10   | 13.41035252      | 13.5          | 13.5          | 1.02080265   | 1.37      | 1.37        | 0.27771307      |

| Likelihoods of Interest |                 |                 |            |
|-------------------------|-----------------|-----------------|------------|
| Model                   | Log Likelihood* | # of Parameters | AIC        |
| A1                      | -56.93965963    | 5               | 123.879319 |
| A2                      | -55.32048927    | 8               | 126.640979 |
| A3                      | -56.93965963    | 5               | 123.879319 |
| fitted                  | -57.58685341    | 3               | 121.173707 |
| R                       | -81.52370706    | 2               | 167.047414 |

| Tests of Interest |                          |         |            |
|-------------------|--------------------------|---------|------------|
| Test              | -2*Log(Likelihood Ratio) | Test df | p-value    |
| 1                 | 52.40643559              | 6       | <0.0001    |
| 2                 | 3.238340728              | 3       | 0.35631708 |
| 3                 | 3.238340728              | 3       | 0.35631708 |
| 4                 | 1.294387559              | 2       | 0.52351281 |

Frequentist Exponential Degree 2 Model with BMR of 1 Std.  
Dev. for the BMD and 0.95 Lower Confidence Limit for the  
BMDL

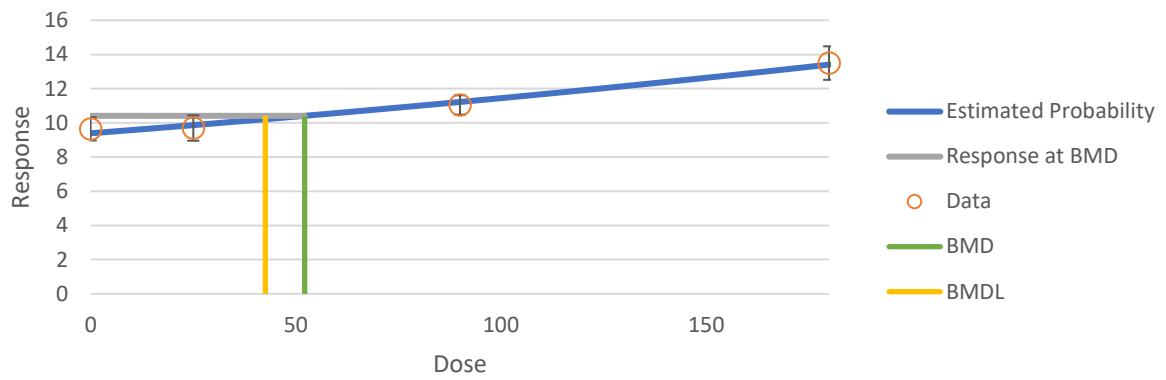

## Frequentist Exponential Restricted Option Set #1

| User Input                                                                                                                                                                                                                                                                                                                                                                                                                                                                                                                                              |                                                          |  |       |                                             |              |                                   |            |                       |                     |                                                          |                                                                                                                                                                                                                                                                                                                                                                                                                                                               |               |  |          |           |      |   |                  |   |                  |      |                   |        |                                                                                                                                                                                                                                                                                                                                                                                                                                                |            |  |                    |              |                      |   |                         |   |                   |           |
|---------------------------------------------------------------------------------------------------------------------------------------------------------------------------------------------------------------------------------------------------------------------------------------------------------------------------------------------------------------------------------------------------------------------------------------------------------------------------------------------------------------------------------------------------------|----------------------------------------------------------|--|-------|---------------------------------------------|--------------|-----------------------------------|------------|-----------------------|---------------------|----------------------------------------------------------|---------------------------------------------------------------------------------------------------------------------------------------------------------------------------------------------------------------------------------------------------------------------------------------------------------------------------------------------------------------------------------------------------------------------------------------------------------------|---------------|--|----------|-----------|------|---|------------------|---|------------------|------|-------------------|--------|------------------------------------------------------------------------------------------------------------------------------------------------------------------------------------------------------------------------------------------------------------------------------------------------------------------------------------------------------------------------------------------------------------------------------------------------|------------|--|--------------------|--------------|----------------------|---|-------------------------|---|-------------------|-----------|
| <table border="1" style="width: 100%; border-collapse: collapse;"> <thead> <tr style="background-color: #add8e6;"> <th style="width: 15%;">Info</th> <th></th> </tr> </thead> <tbody> <tr> <td>Model</td> <td>frequentist<br/>Exponential degree<br/>3 v1.1</td> </tr> <tr> <td>Dataset Name</td> <td>Marx et al. - Liver weight - male</td> </tr> <tr> <td>User notes</td> <td>[Add user notes here]</td> </tr> <tr> <td>Dose-Response Model</td> <td><math>M[\text{dose}] = a * \exp(\pm 1 * (b * \text{dose})^d)</math></td> </tr> </tbody> </table> | Info                                                     |  | Model | frequentist<br>Exponential degree<br>3 v1.1 | Dataset Name | Marx et al. - Liver weight - male | User notes | [Add user notes here] | Dose-Response Model | $M[\text{dose}] = a * \exp(\pm 1 * (b * \text{dose})^d)$ | <table border="1" style="width: 100%; border-collapse: collapse;"> <thead> <tr style="background-color: #add8e6;"> <th style="width: 15%;">Model Options</th> <th></th> </tr> </thead> <tbody> <tr> <td>BMR Type</td> <td>Std. Dev.</td> </tr> <tr> <td>BMRF</td> <td>1</td> </tr> <tr> <td>Tail Probability</td> <td>-</td> </tr> <tr> <td>Confidence Level</td> <td>0.95</td> </tr> <tr> <td>Distribution Type</td> <td>Normal</td> </tr> </tbody> </table> | Model Options |  | BMR Type | Std. Dev. | BMRF | 1 | Tail Probability | - | Confidence Level | 0.95 | Distribution Type | Normal | <table border="1" style="width: 100%; border-collapse: collapse;"> <thead> <tr style="background-color: #add8e6;"> <th style="width: 15%;">Model Data</th> <th></th> </tr> </thead> <tbody> <tr> <td>Dependent Variable</td> <td>mg/kg bw/day</td> </tr> <tr> <td>Independent Variable</td> <td>g</td> </tr> <tr> <td>Total # of Observations</td> <td>4</td> </tr> <tr> <td>Adverse Direction</td> <td>Automatic</td> </tr> </tbody> </table> | Model Data |  | Dependent Variable | mg/kg bw/day | Independent Variable | g | Total # of Observations | 4 | Adverse Direction | Automatic |
| Info                                                                                                                                                                                                                                                                                                                                                                                                                                                                                                                                                    |                                                          |  |       |                                             |              |                                   |            |                       |                     |                                                          |                                                                                                                                                                                                                                                                                                                                                                                                                                                               |               |  |          |           |      |   |                  |   |                  |      |                   |        |                                                                                                                                                                                                                                                                                                                                                                                                                                                |            |  |                    |              |                      |   |                         |   |                   |           |
| Model                                                                                                                                                                                                                                                                                                                                                                                                                                                                                                                                                   | frequentist<br>Exponential degree<br>3 v1.1              |  |       |                                             |              |                                   |            |                       |                     |                                                          |                                                                                                                                                                                                                                                                                                                                                                                                                                                               |               |  |          |           |      |   |                  |   |                  |      |                   |        |                                                                                                                                                                                                                                                                                                                                                                                                                                                |            |  |                    |              |                      |   |                         |   |                   |           |
| Dataset Name                                                                                                                                                                                                                                                                                                                                                                                                                                                                                                                                            | Marx et al. - Liver weight - male                        |  |       |                                             |              |                                   |            |                       |                     |                                                          |                                                                                                                                                                                                                                                                                                                                                                                                                                                               |               |  |          |           |      |   |                  |   |                  |      |                   |        |                                                                                                                                                                                                                                                                                                                                                                                                                                                |            |  |                    |              |                      |   |                         |   |                   |           |
| User notes                                                                                                                                                                                                                                                                                                                                                                                                                                                                                                                                              | [Add user notes here]                                    |  |       |                                             |              |                                   |            |                       |                     |                                                          |                                                                                                                                                                                                                                                                                                                                                                                                                                                               |               |  |          |           |      |   |                  |   |                  |      |                   |        |                                                                                                                                                                                                                                                                                                                                                                                                                                                |            |  |                    |              |                      |   |                         |   |                   |           |
| Dose-Response Model                                                                                                                                                                                                                                                                                                                                                                                                                                                                                                                                     | $M[\text{dose}] = a * \exp(\pm 1 * (b * \text{dose})^d)$ |  |       |                                             |              |                                   |            |                       |                     |                                                          |                                                                                                                                                                                                                                                                                                                                                                                                                                                               |               |  |          |           |      |   |                  |   |                  |      |                   |        |                                                                                                                                                                                                                                                                                                                                                                                                                                                |            |  |                    |              |                      |   |                         |   |                   |           |
| Model Options                                                                                                                                                                                                                                                                                                                                                                                                                                                                                                                                           |                                                          |  |       |                                             |              |                                   |            |                       |                     |                                                          |                                                                                                                                                                                                                                                                                                                                                                                                                                                               |               |  |          |           |      |   |                  |   |                  |      |                   |        |                                                                                                                                                                                                                                                                                                                                                                                                                                                |            |  |                    |              |                      |   |                         |   |                   |           |
| BMR Type                                                                                                                                                                                                                                                                                                                                                                                                                                                                                                                                                | Std. Dev.                                                |  |       |                                             |              |                                   |            |                       |                     |                                                          |                                                                                                                                                                                                                                                                                                                                                                                                                                                               |               |  |          |           |      |   |                  |   |                  |      |                   |        |                                                                                                                                                                                                                                                                                                                                                                                                                                                |            |  |                    |              |                      |   |                         |   |                   |           |
| BMRF                                                                                                                                                                                                                                                                                                                                                                                                                                                                                                                                                    | 1                                                        |  |       |                                             |              |                                   |            |                       |                     |                                                          |                                                                                                                                                                                                                                                                                                                                                                                                                                                               |               |  |          |           |      |   |                  |   |                  |      |                   |        |                                                                                                                                                                                                                                                                                                                                                                                                                                                |            |  |                    |              |                      |   |                         |   |                   |           |
| Tail Probability                                                                                                                                                                                                                                                                                                                                                                                                                                                                                                                                        | -                                                        |  |       |                                             |              |                                   |            |                       |                     |                                                          |                                                                                                                                                                                                                                                                                                                                                                                                                                                               |               |  |          |           |      |   |                  |   |                  |      |                   |        |                                                                                                                                                                                                                                                                                                                                                                                                                                                |            |  |                    |              |                      |   |                         |   |                   |           |
| Confidence Level                                                                                                                                                                                                                                                                                                                                                                                                                                                                                                                                        | 0.95                                                     |  |       |                                             |              |                                   |            |                       |                     |                                                          |                                                                                                                                                                                                                                                                                                                                                                                                                                                               |               |  |          |           |      |   |                  |   |                  |      |                   |        |                                                                                                                                                                                                                                                                                                                                                                                                                                                |            |  |                    |              |                      |   |                         |   |                   |           |
| Distribution Type                                                                                                                                                                                                                                                                                                                                                                                                                                                                                                                                       | Normal                                                   |  |       |                                             |              |                                   |            |                       |                     |                                                          |                                                                                                                                                                                                                                                                                                                                                                                                                                                               |               |  |          |           |      |   |                  |   |                  |      |                   |        |                                                                                                                                                                                                                                                                                                                                                                                                                                                |            |  |                    |              |                      |   |                         |   |                   |           |
| Model Data                                                                                                                                                                                                                                                                                                                                                                                                                                                                                                                                              |                                                          |  |       |                                             |              |                                   |            |                       |                     |                                                          |                                                                                                                                                                                                                                                                                                                                                                                                                                                               |               |  |          |           |      |   |                  |   |                  |      |                   |        |                                                                                                                                                                                                                                                                                                                                                                                                                                                |            |  |                    |              |                      |   |                         |   |                   |           |
| Dependent Variable                                                                                                                                                                                                                                                                                                                                                                                                                                                                                                                                      | mg/kg bw/day                                             |  |       |                                             |              |                                   |            |                       |                     |                                                          |                                                                                                                                                                                                                                                                                                                                                                                                                                                               |               |  |          |           |      |   |                  |   |                  |      |                   |        |                                                                                                                                                                                                                                                                                                                                                                                                                                                |            |  |                    |              |                      |   |                         |   |                   |           |
| Independent Variable                                                                                                                                                                                                                                                                                                                                                                                                                                                                                                                                    | g                                                        |  |       |                                             |              |                                   |            |                       |                     |                                                          |                                                                                                                                                                                                                                                                                                                                                                                                                                                               |               |  |          |           |      |   |                  |   |                  |      |                   |        |                                                                                                                                                                                                                                                                                                                                                                                                                                                |            |  |                    |              |                      |   |                         |   |                   |           |
| Total # of Observations                                                                                                                                                                                                                                                                                                                                                                                                                                                                                                                                 | 4                                                        |  |       |                                             |              |                                   |            |                       |                     |                                                          |                                                                                                                                                                                                                                                                                                                                                                                                                                                               |               |  |          |           |      |   |                  |   |                  |      |                   |        |                                                                                                                                                                                                                                                                                                                                                                                                                                                |            |  |                    |              |                      |   |                         |   |                   |           |
| Adverse Direction                                                                                                                                                                                                                                                                                                                                                                                                                                                                                                                                       | Automatic                                                |  |       |                                             |              |                                   |            |                       |                     |                                                          |                                                                                                                                                                                                                                                                                                                                                                                                                                                               |               |  |          |           |      |   |                  |   |                  |      |                   |        |                                                                                                                                                                                                                                                                                                                                                                                                                                                |            |  |                    |              |                      |   |                         |   |                   |           |

| Model Results                                                                                                                                                                                                                                                                                                                                                                                                                                                                      |             |                  |  |                 |             |          |             |      |             |     |             |                |             |        |   |
|------------------------------------------------------------------------------------------------------------------------------------------------------------------------------------------------------------------------------------------------------------------------------------------------------------------------------------------------------------------------------------------------------------------------------------------------------------------------------------|-------------|------------------|--|-----------------|-------------|----------|-------------|------|-------------|-----|-------------|----------------|-------------|--------|---|
| <table border="1" style="width: 100%; border-collapse: collapse;"> <thead> <tr style="background-color: #add8e6;"> <th colspan="2">Benchmark Dose</th> </tr> </thead> <tbody> <tr> <td>BMD</td> <td>70.43952942</td> </tr> <tr> <td>BMDL</td> <td>44.37955234</td> </tr> <tr> <td>BMDU</td> <td>107.3067368</td> </tr> <tr> <td>AIC</td> <td>122.1164805</td> </tr> <tr> <td>Test 4 P-value</td> <td>0.62626399</td> </tr> <tr> <td>D.O.F.</td> <td>1</td> </tr> </tbody> </table> |             | Benchmark Dose   |  | BMD             | 70.43952942 | BMDL     | 44.37955234 | BMDU | 107.3067368 | AIC | 122.1164805 | Test 4 P-value | 0.62626399  | D.O.F. | 1 |
| Benchmark Dose                                                                                                                                                                                                                                                                                                                                                                                                                                                                     |             |                  |  |                 |             |          |             |      |             |     |             |                |             |        |   |
| BMD                                                                                                                                                                                                                                                                                                                                                                                                                                                                                | 70.43952942 |                  |  |                 |             |          |             |      |             |     |             |                |             |        |   |
| BMDL                                                                                                                                                                                                                                                                                                                                                                                                                                                                               | 44.37955234 |                  |  |                 |             |          |             |      |             |     |             |                |             |        |   |
| BMDU                                                                                                                                                                                                                                                                                                                                                                                                                                                                               | 107.3067368 |                  |  |                 |             |          |             |      |             |     |             |                |             |        |   |
| AIC                                                                                                                                                                                                                                                                                                                                                                                                                                                                                | 122.1164805 |                  |  |                 |             |          |             |      |             |     |             |                |             |        |   |
| Test 4 P-value                                                                                                                                                                                                                                                                                                                                                                                                                                                                     | 0.62626399  |                  |  |                 |             |          |             |      |             |     |             |                |             |        |   |
| D.O.F.                                                                                                                                                                                                                                                                                                                                                                                                                                                                             | 1           |                  |  |                 |             |          |             |      |             |     |             |                |             |        |   |
| <table border="1" style="width: 100%; border-collapse: collapse;"> <thead> <tr style="background-color: #add8e6;"> <th colspan="2">Model Parameters</th> </tr> </thead> <tbody> <tr> <td># of Parameters</td> <td>4</td> </tr> <tr style="background-color: #cccccc;"> <th>Variable</th> <th>Estimate</th> </tr> <tr> <td>a</td> <td>9.573839514</td> </tr> <tr> <td>b</td> <td>0.002475164</td> </tr> <tr> <td>d</td> <td>1.317898041</td> </tr> </tbody> </table>                |             | Model Parameters |  | # of Parameters | 4           | Variable | Estimate    | a    | 9.573839514 | b   | 0.002475164 | d              | 1.317898041 |        |   |
| Model Parameters                                                                                                                                                                                                                                                                                                                                                                                                                                                                   |             |                  |  |                 |             |          |             |      |             |     |             |                |             |        |   |
| # of Parameters                                                                                                                                                                                                                                                                                                                                                                                                                                                                    | 4           |                  |  |                 |             |          |             |      |             |     |             |                |             |        |   |
| Variable                                                                                                                                                                                                                                                                                                                                                                                                                                                                           | Estimate    |                  |  |                 |             |          |             |      |             |     |             |                |             |        |   |
| a                                                                                                                                                                                                                                                                                                                                                                                                                                                                                  | 9.573839514 |                  |  |                 |             |          |             |      |             |     |             |                |             |        |   |
| b                                                                                                                                                                                                                                                                                                                                                                                                                                                                                  | 0.002475164 |                  |  |                 |             |          |             |      |             |     |             |                |             |        |   |
| d                                                                                                                                                                                                                                                                                                                                                                                                                                                                                  | 1.317898041 |                  |  |                 |             |          |             |      |             |     |             |                |             |        |   |

| Goodness of Fit |      |                  |               |               |              |           |             |                 |
|-----------------|------|------------------|---------------|---------------|--------------|-----------|-------------|-----------------|
| Dose            | Size | Estimated Median | Calc'd Median | Observed Mean | Estimated SD | Calc'd SD | Observed SD | Scaled Residual |
| 0               | 10   | 9.573839514      | 9.65          | 9.65          | 1.0075458    | 0.95      | 0.95        | 0.239036878     |
| 25              | 10   | 9.82159541       | 9.7           | 9.7           | 1.0075458    | 1.04      | 1.04        | -0.381638677    |
| 90              | 10   | 10.99280207      | 11.05         | 11.05         | 1.0075458    | 0.79      | 0.79        | 0.179521108     |
| 180             | 10   | 13.51211157      | 13.5          | 13.5          | 1.0075458    | 1.37      | 1.37        | -0.038013304    |

| Likelihoods of Interest |                 |                 |            |
|-------------------------|-----------------|-----------------|------------|
| Model                   | Log Likelihood* | # of Parameters | AIC        |
| A1                      | -56.93965963    | 5               | 123.879319 |
| A2                      | -55.32048927    | 8               | 126.640979 |
| A3                      | -56.93965963    | 5               | 123.879319 |
| fitted                  | -57.05824024    | 4               | 122.11648  |
| R                       | -81.52370706    | 2               | 167.047414 |

| Tests of Interest |                          |         |            |
|-------------------|--------------------------|---------|------------|
| Test              | -2*Log(Likelihood Ratio) | Test df | p-value    |
| 1                 | 52.40643559              | 6       | <0.0001    |
| 2                 | 3.238340728              | 3       | 0.35631708 |
| 3                 | 3.238340728              | 3       | 0.35631708 |
| 4                 | 0.237161222              | 1       | 0.62626399 |



Frequentist Exponential Degree 3 Model with BMR of 1 Std.  
Dev. for the BMD and 0.95 Lower Confidence Limit for the  
BMDL

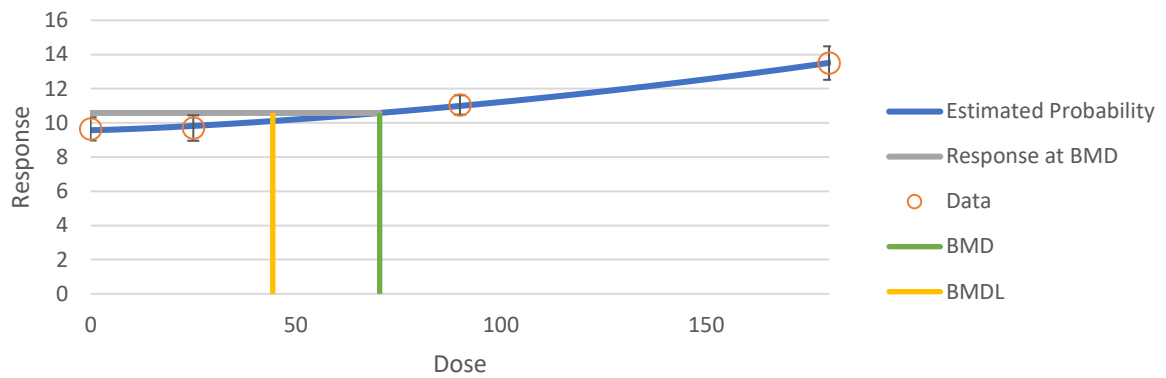

## Frequentist Exponential Restricted Option Set #1

| User Input                                                                                                                                                                                                                                                                                                                                                                                                                                                                                                                                                   |                                                               |  |       |                                             |              |                                   |            |                       |                     |                                                               |                                                                                                                                                                                                                                                                                                                                                                                                                                                               |               |  |          |           |      |   |                  |   |                  |      |                   |        |                                                                                                                                                                                                                                                                                                                                                                                                                                                |            |  |                    |              |                      |   |                         |   |                   |           |
|--------------------------------------------------------------------------------------------------------------------------------------------------------------------------------------------------------------------------------------------------------------------------------------------------------------------------------------------------------------------------------------------------------------------------------------------------------------------------------------------------------------------------------------------------------------|---------------------------------------------------------------|--|-------|---------------------------------------------|--------------|-----------------------------------|------------|-----------------------|---------------------|---------------------------------------------------------------|---------------------------------------------------------------------------------------------------------------------------------------------------------------------------------------------------------------------------------------------------------------------------------------------------------------------------------------------------------------------------------------------------------------------------------------------------------------|---------------|--|----------|-----------|------|---|------------------|---|------------------|------|-------------------|--------|------------------------------------------------------------------------------------------------------------------------------------------------------------------------------------------------------------------------------------------------------------------------------------------------------------------------------------------------------------------------------------------------------------------------------------------------|------------|--|--------------------|--------------|----------------------|---|-------------------------|---|-------------------|-----------|
| <table border="1" style="width: 100%; border-collapse: collapse;"> <thead> <tr style="background-color: #add8e6;"> <th style="width: 15%;">Info</th> <th></th> </tr> </thead> <tbody> <tr> <td>Model</td> <td>frequentist<br/>Exponential degree<br/>4 v1.1</td> </tr> <tr> <td>Dataset Name</td> <td>Marx et al. - Liver weight - male</td> </tr> <tr> <td>User notes</td> <td>[Add user notes here]</td> </tr> <tr> <td>Dose-Response Model</td> <td><math>M[\text{dose}] = a * [c - (c - 1) * \exp(-b * \text{dose})]</math></td> </tr> </tbody> </table> | Info                                                          |  | Model | frequentist<br>Exponential degree<br>4 v1.1 | Dataset Name | Marx et al. - Liver weight - male | User notes | [Add user notes here] | Dose-Response Model | $M[\text{dose}] = a * [c - (c - 1) * \exp(-b * \text{dose})]$ | <table border="1" style="width: 100%; border-collapse: collapse;"> <thead> <tr style="background-color: #add8e6;"> <th style="width: 15%;">Model Options</th> <th></th> </tr> </thead> <tbody> <tr> <td>BMR Type</td> <td>Std. Dev.</td> </tr> <tr> <td>BMRF</td> <td>1</td> </tr> <tr> <td>Tail Probability</td> <td>-</td> </tr> <tr> <td>Confidence Level</td> <td>0.95</td> </tr> <tr> <td>Distribution Type</td> <td>Normal</td> </tr> </tbody> </table> | Model Options |  | BMR Type | Std. Dev. | BMRF | 1 | Tail Probability | - | Confidence Level | 0.95 | Distribution Type | Normal | <table border="1" style="width: 100%; border-collapse: collapse;"> <thead> <tr style="background-color: #add8e6;"> <th style="width: 15%;">Model Data</th> <th></th> </tr> </thead> <tbody> <tr> <td>Dependent Variable</td> <td>mg/kg bw/day</td> </tr> <tr> <td>Independent Variable</td> <td>g</td> </tr> <tr> <td>Total # of Observations</td> <td>4</td> </tr> <tr> <td>Adverse Direction</td> <td>Automatic</td> </tr> </tbody> </table> | Model Data |  | Dependent Variable | mg/kg bw/day | Independent Variable | g | Total # of Observations | 4 | Adverse Direction | Automatic |
| Info                                                                                                                                                                                                                                                                                                                                                                                                                                                                                                                                                         |                                                               |  |       |                                             |              |                                   |            |                       |                     |                                                               |                                                                                                                                                                                                                                                                                                                                                                                                                                                               |               |  |          |           |      |   |                  |   |                  |      |                   |        |                                                                                                                                                                                                                                                                                                                                                                                                                                                |            |  |                    |              |                      |   |                         |   |                   |           |
| Model                                                                                                                                                                                                                                                                                                                                                                                                                                                                                                                                                        | frequentist<br>Exponential degree<br>4 v1.1                   |  |       |                                             |              |                                   |            |                       |                     |                                                               |                                                                                                                                                                                                                                                                                                                                                                                                                                                               |               |  |          |           |      |   |                  |   |                  |      |                   |        |                                                                                                                                                                                                                                                                                                                                                                                                                                                |            |  |                    |              |                      |   |                         |   |                   |           |
| Dataset Name                                                                                                                                                                                                                                                                                                                                                                                                                                                                                                                                                 | Marx et al. - Liver weight - male                             |  |       |                                             |              |                                   |            |                       |                     |                                                               |                                                                                                                                                                                                                                                                                                                                                                                                                                                               |               |  |          |           |      |   |                  |   |                  |      |                   |        |                                                                                                                                                                                                                                                                                                                                                                                                                                                |            |  |                    |              |                      |   |                         |   |                   |           |
| User notes                                                                                                                                                                                                                                                                                                                                                                                                                                                                                                                                                   | [Add user notes here]                                         |  |       |                                             |              |                                   |            |                       |                     |                                                               |                                                                                                                                                                                                                                                                                                                                                                                                                                                               |               |  |          |           |      |   |                  |   |                  |      |                   |        |                                                                                                                                                                                                                                                                                                                                                                                                                                                |            |  |                    |              |                      |   |                         |   |                   |           |
| Dose-Response Model                                                                                                                                                                                                                                                                                                                                                                                                                                                                                                                                          | $M[\text{dose}] = a * [c - (c - 1) * \exp(-b * \text{dose})]$ |  |       |                                             |              |                                   |            |                       |                     |                                                               |                                                                                                                                                                                                                                                                                                                                                                                                                                                               |               |  |          |           |      |   |                  |   |                  |      |                   |        |                                                                                                                                                                                                                                                                                                                                                                                                                                                |            |  |                    |              |                      |   |                         |   |                   |           |
| Model Options                                                                                                                                                                                                                                                                                                                                                                                                                                                                                                                                                |                                                               |  |       |                                             |              |                                   |            |                       |                     |                                                               |                                                                                                                                                                                                                                                                                                                                                                                                                                                               |               |  |          |           |      |   |                  |   |                  |      |                   |        |                                                                                                                                                                                                                                                                                                                                                                                                                                                |            |  |                    |              |                      |   |                         |   |                   |           |
| BMR Type                                                                                                                                                                                                                                                                                                                                                                                                                                                                                                                                                     | Std. Dev.                                                     |  |       |                                             |              |                                   |            |                       |                     |                                                               |                                                                                                                                                                                                                                                                                                                                                                                                                                                               |               |  |          |           |      |   |                  |   |                  |      |                   |        |                                                                                                                                                                                                                                                                                                                                                                                                                                                |            |  |                    |              |                      |   |                         |   |                   |           |
| BMRF                                                                                                                                                                                                                                                                                                                                                                                                                                                                                                                                                         | 1                                                             |  |       |                                             |              |                                   |            |                       |                     |                                                               |                                                                                                                                                                                                                                                                                                                                                                                                                                                               |               |  |          |           |      |   |                  |   |                  |      |                   |        |                                                                                                                                                                                                                                                                                                                                                                                                                                                |            |  |                    |              |                      |   |                         |   |                   |           |
| Tail Probability                                                                                                                                                                                                                                                                                                                                                                                                                                                                                                                                             | -                                                             |  |       |                                             |              |                                   |            |                       |                     |                                                               |                                                                                                                                                                                                                                                                                                                                                                                                                                                               |               |  |          |           |      |   |                  |   |                  |      |                   |        |                                                                                                                                                                                                                                                                                                                                                                                                                                                |            |  |                    |              |                      |   |                         |   |                   |           |
| Confidence Level                                                                                                                                                                                                                                                                                                                                                                                                                                                                                                                                             | 0.95                                                          |  |       |                                             |              |                                   |            |                       |                     |                                                               |                                                                                                                                                                                                                                                                                                                                                                                                                                                               |               |  |          |           |      |   |                  |   |                  |      |                   |        |                                                                                                                                                                                                                                                                                                                                                                                                                                                |            |  |                    |              |                      |   |                         |   |                   |           |
| Distribution Type                                                                                                                                                                                                                                                                                                                                                                                                                                                                                                                                            | Normal                                                        |  |       |                                             |              |                                   |            |                       |                     |                                                               |                                                                                                                                                                                                                                                                                                                                                                                                                                                               |               |  |          |           |      |   |                  |   |                  |      |                   |        |                                                                                                                                                                                                                                                                                                                                                                                                                                                |            |  |                    |              |                      |   |                         |   |                   |           |
| Model Data                                                                                                                                                                                                                                                                                                                                                                                                                                                                                                                                                   |                                                               |  |       |                                             |              |                                   |            |                       |                     |                                                               |                                                                                                                                                                                                                                                                                                                                                                                                                                                               |               |  |          |           |      |   |                  |   |                  |      |                   |        |                                                                                                                                                                                                                                                                                                                                                                                                                                                |            |  |                    |              |                      |   |                         |   |                   |           |
| Dependent Variable                                                                                                                                                                                                                                                                                                                                                                                                                                                                                                                                           | mg/kg bw/day                                                  |  |       |                                             |              |                                   |            |                       |                     |                                                               |                                                                                                                                                                                                                                                                                                                                                                                                                                                               |               |  |          |           |      |   |                  |   |                  |      |                   |        |                                                                                                                                                                                                                                                                                                                                                                                                                                                |            |  |                    |              |                      |   |                         |   |                   |           |
| Independent Variable                                                                                                                                                                                                                                                                                                                                                                                                                                                                                                                                         | g                                                             |  |       |                                             |              |                                   |            |                       |                     |                                                               |                                                                                                                                                                                                                                                                                                                                                                                                                                                               |               |  |          |           |      |   |                  |   |                  |      |                   |        |                                                                                                                                                                                                                                                                                                                                                                                                                                                |            |  |                    |              |                      |   |                         |   |                   |           |
| Total # of Observations                                                                                                                                                                                                                                                                                                                                                                                                                                                                                                                                      | 4                                                             |  |       |                                             |              |                                   |            |                       |                     |                                                               |                                                                                                                                                                                                                                                                                                                                                                                                                                                               |               |  |          |           |      |   |                  |   |                  |      |                   |        |                                                                                                                                                                                                                                                                                                                                                                                                                                                |            |  |                    |              |                      |   |                         |   |                   |           |
| Adverse Direction                                                                                                                                                                                                                                                                                                                                                                                                                                                                                                                                            | Automatic                                                     |  |       |                                             |              |                                   |            |                       |                     |                                                               |                                                                                                                                                                                                                                                                                                                                                                                                                                                               |               |  |          |           |      |   |                  |   |                  |      |                   |        |                                                                                                                                                                                                                                                                                                                                                                                                                                                |            |  |                    |              |                      |   |                         |   |                   |           |

| Model Results                                                                                                                                                                                                                                                                                                                                                                                                                                                          |             |                  |  |                 |             |          |          |      |            |     |             |                |             |        |   |
|------------------------------------------------------------------------------------------------------------------------------------------------------------------------------------------------------------------------------------------------------------------------------------------------------------------------------------------------------------------------------------------------------------------------------------------------------------------------|-------------|------------------|--|-----------------|-------------|----------|----------|------|------------|-----|-------------|----------------|-------------|--------|---|
| <table border="1" style="width: 100%; border-collapse: collapse;"> <thead> <tr style="background-color: #add8e6;"> <th colspan="2">Benchmark Dose</th> </tr> </thead> <tbody> <tr> <td>BMD</td> <td>46.66477203</td> </tr> <tr> <td>BMDL</td> <td>0</td> </tr> <tr> <td>BMDU</td> <td>Infinity</td> </tr> <tr> <td>AIC</td> <td>122.2262667</td> </tr> <tr> <td>Test 4 P-value</td> <td>0.309290687</td> </tr> <tr> <td>D.O.F.</td> <td>2</td> </tr> </tbody> </table> |             | Benchmark Dose   |  | BMD             | 46.66477203 | BMDL     | 0        | BMDU | Infinity   | AIC | 122.2262667 | Test 4 P-value | 0.309290687 | D.O.F. | 2 |
| Benchmark Dose                                                                                                                                                                                                                                                                                                                                                                                                                                                         |             |                  |  |                 |             |          |          |      |            |     |             |                |             |        |   |
| BMD                                                                                                                                                                                                                                                                                                                                                                                                                                                                    | 46.66477203 |                  |  |                 |             |          |          |      |            |     |             |                |             |        |   |
| BMDL                                                                                                                                                                                                                                                                                                                                                                                                                                                                   | 0           |                  |  |                 |             |          |          |      |            |     |             |                |             |        |   |
| BMDU                                                                                                                                                                                                                                                                                                                                                                                                                                                                   | Infinity    |                  |  |                 |             |          |          |      |            |     |             |                |             |        |   |
| AIC                                                                                                                                                                                                                                                                                                                                                                                                                                                                    | 122.2262667 |                  |  |                 |             |          |          |      |            |     |             |                |             |        |   |
| Test 4 P-value                                                                                                                                                                                                                                                                                                                                                                                                                                                         | 0.309290687 |                  |  |                 |             |          |          |      |            |     |             |                |             |        |   |
| D.O.F.                                                                                                                                                                                                                                                                                                                                                                                                                                                                 | 2           |                  |  |                 |             |          |          |      |            |     |             |                |             |        |   |
| <table border="1" style="width: 100%; border-collapse: collapse;"> <thead> <tr style="background-color: #add8e6;"> <th colspan="2">Model Parameters</th> </tr> </thead> <tbody> <tr> <td># of Parameters</td> <td>4</td> </tr> <tr style="background-color: #cccccc;"> <td>Variable</td> <td>Estimate</td> </tr> <tr> <td>a</td> <td>9.34006967</td> </tr> <tr> <td>b</td> <td>Bounded</td> </tr> <tr> <td>c</td> <td>71828.30797</td> </tr> </tbody> </table>         |             | Model Parameters |  | # of Parameters | 4           | Variable | Estimate | a    | 9.34006967 | b   | Bounded     | c              | 71828.30797 |        |   |
| Model Parameters                                                                                                                                                                                                                                                                                                                                                                                                                                                       |             |                  |  |                 |             |          |          |      |            |     |             |                |             |        |   |
| # of Parameters                                                                                                                                                                                                                                                                                                                                                                                                                                                        | 4           |                  |  |                 |             |          |          |      |            |     |             |                |             |        |   |
| Variable                                                                                                                                                                                                                                                                                                                                                                                                                                                               | Estimate    |                  |  |                 |             |          |          |      |            |     |             |                |             |        |   |
| a                                                                                                                                                                                                                                                                                                                                                                                                                                                                      | 9.34006967  |                  |  |                 |             |          |          |      |            |     |             |                |             |        |   |
| b                                                                                                                                                                                                                                                                                                                                                                                                                                                                      | Bounded     |                  |  |                 |             |          |          |      |            |     |             |                |             |        |   |
| c                                                                                                                                                                                                                                                                                                                                                                                                                                                                      | 71828.30797 |                  |  |                 |             |          |          |      |            |     |             |                |             |        |   |

| Goodness of Fit |      |                  |               |               |              |           |             |                 |
|-----------------|------|------------------|---------------|---------------|--------------|-----------|-------------|-----------------|
| Dose            | Size | Estimated Median | Calc'd Median | Observed Mean | Estimated SD | Calc'd SD | Observed SD | Scaled Residual |
| 0               | 10   | 9.34006967       | 9.65          | 9.65          | 1.03448997   | 0.95      | 0.95        | 0.947409628     |
| 25              | 10   | 9.894283135      | 9.7           | 9.7           | 1.03448997   | 1.04      | 1.04        | -0.593893836    |
| 90              | 10   | 11.335236        | 11.05         | 11.05         | 1.03448997   | 0.79      | 0.79        | -0.871922844    |
| 180             | 10   | 13.3303964       | 13.5          | 13.5          | 1.03448997   | 1.37      | 1.37        | 0.518452264     |

| Likelihoods of Interest |                 |                 |            |
|-------------------------|-----------------|-----------------|------------|
| Model                   | Log Likelihood* | # of Parameters | AIC        |
| A1                      | -56.93965963    | 5               | 123.879319 |
| A2                      | -55.32048927    | 8               | 126.640979 |
| A3                      | -56.93965963    | 5               | 123.879319 |
| fitted                  | -58.11313334    | 3               | 122.226267 |
| R                       | -81.52370706    | 2               | 167.047414 |

| Tests of Interest |                          |         |            |
|-------------------|--------------------------|---------|------------|
| Test              | -2*Log(Likelihood Ratio) | Test df | p-value    |
| 1                 | 52.40643559              | 6       | <0.0001    |
| 2                 | 3.238340728              | 3       | 0.35631708 |
| 3                 | 3.238340728              | 3       | 0.35631708 |
| 4                 | 2.346947419              | 2       | 0.30929069 |

Frequentist Exponential Degree 4 Model with BMR of 1 Std.  
Dev. for the BMD and 0.95 Lower Confidence Limit for the  
BMDL

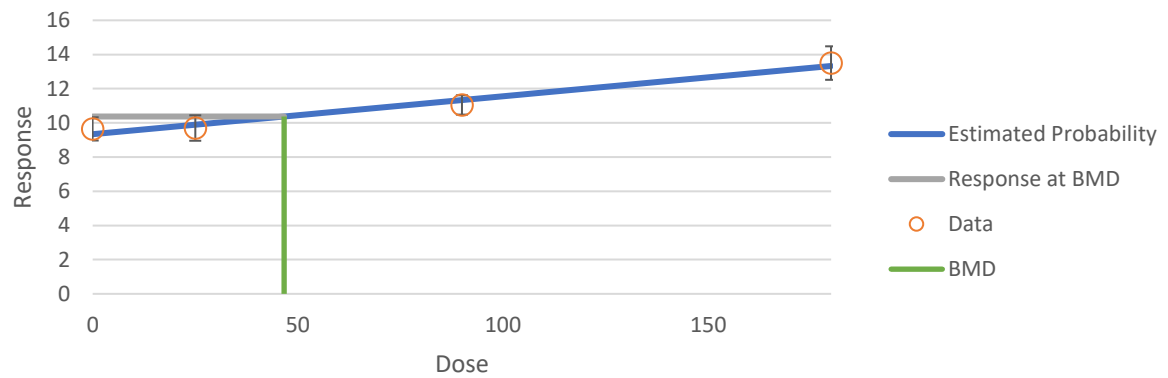

## Frequentist Exponential Restricted Option Set #1

| User Input                                                                                                                                                                                                                                                                                                                                                                                                                                                                                                                                                       |                                                                   |  |       |                                             |              |                                   |            |                       |                     |                                                                   |                                                                                                                                                                                                                                                                                                                                                                                                                                                               |               |  |          |           |      |   |                  |   |                  |      |                   |        |                                                                                                                                                                                                                                                                                                                                                                                                                                                |            |  |                    |              |                      |   |                         |   |                   |           |
|------------------------------------------------------------------------------------------------------------------------------------------------------------------------------------------------------------------------------------------------------------------------------------------------------------------------------------------------------------------------------------------------------------------------------------------------------------------------------------------------------------------------------------------------------------------|-------------------------------------------------------------------|--|-------|---------------------------------------------|--------------|-----------------------------------|------------|-----------------------|---------------------|-------------------------------------------------------------------|---------------------------------------------------------------------------------------------------------------------------------------------------------------------------------------------------------------------------------------------------------------------------------------------------------------------------------------------------------------------------------------------------------------------------------------------------------------|---------------|--|----------|-----------|------|---|------------------|---|------------------|------|-------------------|--------|------------------------------------------------------------------------------------------------------------------------------------------------------------------------------------------------------------------------------------------------------------------------------------------------------------------------------------------------------------------------------------------------------------------------------------------------|------------|--|--------------------|--------------|----------------------|---|-------------------------|---|-------------------|-----------|
| <table border="1" style="width: 100%; border-collapse: collapse;"> <thead> <tr style="background-color: #add8e6;"> <th style="width: 15%;">Info</th> <th></th> </tr> </thead> <tbody> <tr> <td>Model</td> <td>frequentist<br/>Exponential degree<br/>5 v1.1</td> </tr> <tr> <td>Dataset Name</td> <td>Marx et al. - Liver weight - male</td> </tr> <tr> <td>User notes</td> <td>[Add user notes here]</td> </tr> <tr> <td>Dose-Response Model</td> <td><math>M[\text{dose}] = a * [c - (c - 1) * \exp(-(b * \text{dose})^d)]</math></td> </tr> </tbody> </table> | Info                                                              |  | Model | frequentist<br>Exponential degree<br>5 v1.1 | Dataset Name | Marx et al. - Liver weight - male | User notes | [Add user notes here] | Dose-Response Model | $M[\text{dose}] = a * [c - (c - 1) * \exp(-(b * \text{dose})^d)]$ | <table border="1" style="width: 100%; border-collapse: collapse;"> <thead> <tr style="background-color: #add8e6;"> <th style="width: 15%;">Model Options</th> <th></th> </tr> </thead> <tbody> <tr> <td>BMR Type</td> <td>Std. Dev.</td> </tr> <tr> <td>BMRF</td> <td>1</td> </tr> <tr> <td>Tail Probability</td> <td>-</td> </tr> <tr> <td>Confidence Level</td> <td>0.95</td> </tr> <tr> <td>Distribution Type</td> <td>Normal</td> </tr> </tbody> </table> | Model Options |  | BMR Type | Std. Dev. | BMRF | 1 | Tail Probability | - | Confidence Level | 0.95 | Distribution Type | Normal | <table border="1" style="width: 100%; border-collapse: collapse;"> <thead> <tr style="background-color: #add8e6;"> <th style="width: 15%;">Model Data</th> <th></th> </tr> </thead> <tbody> <tr> <td>Dependent Variable</td> <td>mg/kg bw/day</td> </tr> <tr> <td>Independent Variable</td> <td>g</td> </tr> <tr> <td>Total # of Observations</td> <td>4</td> </tr> <tr> <td>Adverse Direction</td> <td>Automatic</td> </tr> </tbody> </table> | Model Data |  | Dependent Variable | mg/kg bw/day | Independent Variable | g | Total # of Observations | 4 | Adverse Direction | Automatic |
| Info                                                                                                                                                                                                                                                                                                                                                                                                                                                                                                                                                             |                                                                   |  |       |                                             |              |                                   |            |                       |                     |                                                                   |                                                                                                                                                                                                                                                                                                                                                                                                                                                               |               |  |          |           |      |   |                  |   |                  |      |                   |        |                                                                                                                                                                                                                                                                                                                                                                                                                                                |            |  |                    |              |                      |   |                         |   |                   |           |
| Model                                                                                                                                                                                                                                                                                                                                                                                                                                                                                                                                                            | frequentist<br>Exponential degree<br>5 v1.1                       |  |       |                                             |              |                                   |            |                       |                     |                                                                   |                                                                                                                                                                                                                                                                                                                                                                                                                                                               |               |  |          |           |      |   |                  |   |                  |      |                   |        |                                                                                                                                                                                                                                                                                                                                                                                                                                                |            |  |                    |              |                      |   |                         |   |                   |           |
| Dataset Name                                                                                                                                                                                                                                                                                                                                                                                                                                                                                                                                                     | Marx et al. - Liver weight - male                                 |  |       |                                             |              |                                   |            |                       |                     |                                                                   |                                                                                                                                                                                                                                                                                                                                                                                                                                                               |               |  |          |           |      |   |                  |   |                  |      |                   |        |                                                                                                                                                                                                                                                                                                                                                                                                                                                |            |  |                    |              |                      |   |                         |   |                   |           |
| User notes                                                                                                                                                                                                                                                                                                                                                                                                                                                                                                                                                       | [Add user notes here]                                             |  |       |                                             |              |                                   |            |                       |                     |                                                                   |                                                                                                                                                                                                                                                                                                                                                                                                                                                               |               |  |          |           |      |   |                  |   |                  |      |                   |        |                                                                                                                                                                                                                                                                                                                                                                                                                                                |            |  |                    |              |                      |   |                         |   |                   |           |
| Dose-Response Model                                                                                                                                                                                                                                                                                                                                                                                                                                                                                                                                              | $M[\text{dose}] = a * [c - (c - 1) * \exp(-(b * \text{dose})^d)]$ |  |       |                                             |              |                                   |            |                       |                     |                                                                   |                                                                                                                                                                                                                                                                                                                                                                                                                                                               |               |  |          |           |      |   |                  |   |                  |      |                   |        |                                                                                                                                                                                                                                                                                                                                                                                                                                                |            |  |                    |              |                      |   |                         |   |                   |           |
| Model Options                                                                                                                                                                                                                                                                                                                                                                                                                                                                                                                                                    |                                                                   |  |       |                                             |              |                                   |            |                       |                     |                                                                   |                                                                                                                                                                                                                                                                                                                                                                                                                                                               |               |  |          |           |      |   |                  |   |                  |      |                   |        |                                                                                                                                                                                                                                                                                                                                                                                                                                                |            |  |                    |              |                      |   |                         |   |                   |           |
| BMR Type                                                                                                                                                                                                                                                                                                                                                                                                                                                                                                                                                         | Std. Dev.                                                         |  |       |                                             |              |                                   |            |                       |                     |                                                                   |                                                                                                                                                                                                                                                                                                                                                                                                                                                               |               |  |          |           |      |   |                  |   |                  |      |                   |        |                                                                                                                                                                                                                                                                                                                                                                                                                                                |            |  |                    |              |                      |   |                         |   |                   |           |
| BMRF                                                                                                                                                                                                                                                                                                                                                                                                                                                                                                                                                             | 1                                                                 |  |       |                                             |              |                                   |            |                       |                     |                                                                   |                                                                                                                                                                                                                                                                                                                                                                                                                                                               |               |  |          |           |      |   |                  |   |                  |      |                   |        |                                                                                                                                                                                                                                                                                                                                                                                                                                                |            |  |                    |              |                      |   |                         |   |                   |           |
| Tail Probability                                                                                                                                                                                                                                                                                                                                                                                                                                                                                                                                                 | -                                                                 |  |       |                                             |              |                                   |            |                       |                     |                                                                   |                                                                                                                                                                                                                                                                                                                                                                                                                                                               |               |  |          |           |      |   |                  |   |                  |      |                   |        |                                                                                                                                                                                                                                                                                                                                                                                                                                                |            |  |                    |              |                      |   |                         |   |                   |           |
| Confidence Level                                                                                                                                                                                                                                                                                                                                                                                                                                                                                                                                                 | 0.95                                                              |  |       |                                             |              |                                   |            |                       |                     |                                                                   |                                                                                                                                                                                                                                                                                                                                                                                                                                                               |               |  |          |           |      |   |                  |   |                  |      |                   |        |                                                                                                                                                                                                                                                                                                                                                                                                                                                |            |  |                    |              |                      |   |                         |   |                   |           |
| Distribution Type                                                                                                                                                                                                                                                                                                                                                                                                                                                                                                                                                | Normal                                                            |  |       |                                             |              |                                   |            |                       |                     |                                                                   |                                                                                                                                                                                                                                                                                                                                                                                                                                                               |               |  |          |           |      |   |                  |   |                  |      |                   |        |                                                                                                                                                                                                                                                                                                                                                                                                                                                |            |  |                    |              |                      |   |                         |   |                   |           |
| Model Data                                                                                                                                                                                                                                                                                                                                                                                                                                                                                                                                                       |                                                                   |  |       |                                             |              |                                   |            |                       |                     |                                                                   |                                                                                                                                                                                                                                                                                                                                                                                                                                                               |               |  |          |           |      |   |                  |   |                  |      |                   |        |                                                                                                                                                                                                                                                                                                                                                                                                                                                |            |  |                    |              |                      |   |                         |   |                   |           |
| Dependent Variable                                                                                                                                                                                                                                                                                                                                                                                                                                                                                                                                               | mg/kg bw/day                                                      |  |       |                                             |              |                                   |            |                       |                     |                                                                   |                                                                                                                                                                                                                                                                                                                                                                                                                                                               |               |  |          |           |      |   |                  |   |                  |      |                   |        |                                                                                                                                                                                                                                                                                                                                                                                                                                                |            |  |                    |              |                      |   |                         |   |                   |           |
| Independent Variable                                                                                                                                                                                                                                                                                                                                                                                                                                                                                                                                             | g                                                                 |  |       |                                             |              |                                   |            |                       |                     |                                                                   |                                                                                                                                                                                                                                                                                                                                                                                                                                                               |               |  |          |           |      |   |                  |   |                  |      |                   |        |                                                                                                                                                                                                                                                                                                                                                                                                                                                |            |  |                    |              |                      |   |                         |   |                   |           |
| Total # of Observations                                                                                                                                                                                                                                                                                                                                                                                                                                                                                                                                          | 4                                                                 |  |       |                                             |              |                                   |            |                       |                     |                                                                   |                                                                                                                                                                                                                                                                                                                                                                                                                                                               |               |  |          |           |      |   |                  |   |                  |      |                   |        |                                                                                                                                                                                                                                                                                                                                                                                                                                                |            |  |                    |              |                      |   |                         |   |                   |           |
| Adverse Direction                                                                                                                                                                                                                                                                                                                                                                                                                                                                                                                                                | Automatic                                                         |  |       |                                             |              |                                   |            |                       |                     |                                                                   |                                                                                                                                                                                                                                                                                                                                                                                                                                                               |               |  |          |           |      |   |                  |   |                  |      |                   |        |                                                                                                                                                                                                                                                                                                                                                                                                                                                |            |  |                    |              |                      |   |                         |   |                   |           |

| Model Results                                                                                                                                                                                                                                                                                                                                                                                                                                                                                                  |             |                  |  |                 |             |          |            |      |             |     |             |                |             |        |             |
|----------------------------------------------------------------------------------------------------------------------------------------------------------------------------------------------------------------------------------------------------------------------------------------------------------------------------------------------------------------------------------------------------------------------------------------------------------------------------------------------------------------|-------------|------------------|--|-----------------|-------------|----------|------------|------|-------------|-----|-------------|----------------|-------------|--------|-------------|
| <table border="1" style="width: 100%; border-collapse: collapse;"> <thead> <tr style="background-color: #add8e6;"> <th colspan="2">Benchmark Dose</th> </tr> </thead> <tbody> <tr> <td>BMD</td> <td>71.04214668</td> </tr> <tr> <td>BMDL</td> <td>46.1005208</td> </tr> <tr> <td>BMDU</td> <td>106.3789001</td> </tr> <tr> <td>AIC</td> <td>124.0444783</td> </tr> <tr> <td>Test 4 P-value</td> <td>NA</td> </tr> <tr> <td>D.O.F.</td> <td>0</td> </tr> </tbody> </table>                                      |             | Benchmark Dose   |  | BMD             | 71.04214668 | BMDL     | 46.1005208 | BMDU | 106.3789001 | AIC | 124.0444783 | Test 4 P-value | NA          | D.O.F. | 0           |
| Benchmark Dose                                                                                                                                                                                                                                                                                                                                                                                                                                                                                                 |             |                  |  |                 |             |          |            |      |             |     |             |                |             |        |             |
| BMD                                                                                                                                                                                                                                                                                                                                                                                                                                                                                                            | 71.04214668 |                  |  |                 |             |          |            |      |             |     |             |                |             |        |             |
| BMDL                                                                                                                                                                                                                                                                                                                                                                                                                                                                                                           | 46.1005208  |                  |  |                 |             |          |            |      |             |     |             |                |             |        |             |
| BMDU                                                                                                                                                                                                                                                                                                                                                                                                                                                                                                           | 106.3789001 |                  |  |                 |             |          |            |      |             |     |             |                |             |        |             |
| AIC                                                                                                                                                                                                                                                                                                                                                                                                                                                                                                            | 124.0444783 |                  |  |                 |             |          |            |      |             |     |             |                |             |        |             |
| Test 4 P-value                                                                                                                                                                                                                                                                                                                                                                                                                                                                                                 | NA          |                  |  |                 |             |          |            |      |             |     |             |                |             |        |             |
| D.O.F.                                                                                                                                                                                                                                                                                                                                                                                                                                                                                                         | 0           |                  |  |                 |             |          |            |      |             |     |             |                |             |        |             |
| <table border="1" style="width: 100%; border-collapse: collapse;"> <thead> <tr style="background-color: #add8e6;"> <th colspan="2">Model Parameters</th> </tr> </thead> <tbody> <tr> <td># of Parameters</td> <td>5</td> </tr> <tr style="background-color: #cccccc;"> <td>Variable</td> <td>Estimate</td> </tr> <tr> <td>a</td> <td>9.583475723</td> </tr> <tr> <td>b</td> <td>6.86878E-05</td> </tr> <tr> <td>c</td> <td>256.6885755</td> </tr> <tr> <td>d</td> <td>1.464932648</td> </tr> </tbody> </table> |             | Model Parameters |  | # of Parameters | 5           | Variable | Estimate   | a    | 9.583475723 | b   | 6.86878E-05 | c              | 256.6885755 | d      | 1.464932648 |
| Model Parameters                                                                                                                                                                                                                                                                                                                                                                                                                                                                                               |             |                  |  |                 |             |          |            |      |             |     |             |                |             |        |             |
| # of Parameters                                                                                                                                                                                                                                                                                                                                                                                                                                                                                                | 5           |                  |  |                 |             |          |            |      |             |     |             |                |             |        |             |
| Variable                                                                                                                                                                                                                                                                                                                                                                                                                                                                                                       | Estimate    |                  |  |                 |             |          |            |      |             |     |             |                |             |        |             |
| a                                                                                                                                                                                                                                                                                                                                                                                                                                                                                                              | 9.583475723 |                  |  |                 |             |          |            |      |             |     |             |                |             |        |             |
| b                                                                                                                                                                                                                                                                                                                                                                                                                                                                                                              | 6.86878E-05 |                  |  |                 |             |          |            |      |             |     |             |                |             |        |             |
| c                                                                                                                                                                                                                                                                                                                                                                                                                                                                                                              | 256.6885755 |                  |  |                 |             |          |            |      |             |     |             |                |             |        |             |
| d                                                                                                                                                                                                                                                                                                                                                                                                                                                                                                              | 1.464932648 |                  |  |                 |             |          |            |      |             |     |             |                |             |        |             |

| Goodness of Fit |      |                  |               |               |              |           |             |                 |
|-----------------|------|------------------|---------------|---------------|--------------|-----------|-------------|-----------------|
| Dose            | Size | Estimated Median | Calc'd Median | Observed Mean | Estimated SD | Calc'd SD | Observed SD | Scaled Residual |
| 0               | 10   | 9.583475723      | 9.65          | 9.65          | 1.00646987   | 0.95      | 0.95        | 0.209015928     |
| 25              | 10   | 9.801453598      | 9.7           | 9.7           | 1.00646987   | 1.04      | 1.04        | -0.318762097    |
| 90              | 10   | 11.0066277       | 11.05         | 11.05         | 1.00646987   | 0.79      | 0.79        | 0.136273594     |
| 180             | 10   | 13.51008687      | 13.5          | 13.5          | 1.00646987   | 1.37      | 1.37        | -0.031692445    |

| Likelihoods of Interest |                 |                 |            |
|-------------------------|-----------------|-----------------|------------|
| Model                   | Log Likelihood* | # of Parameters | AIC        |
| A1                      | -56.93965963    | 5               | 123.879319 |
| A2                      | -55.32048927    | 8               | 126.640979 |
| A3                      | -56.93965963    | 5               | 123.879319 |
| fitted                  | -57.02223917    | 5               | 124.044478 |
| R                       | -81.52370706    | 2               | 167.047414 |

| Tests of Interest |                          |         |            |
|-------------------|--------------------------|---------|------------|
| Test              | -2*Log(Likelihood Ratio) | Test df | p-value    |
| 1                 | 52.40643559              | 6       | <0.0001    |
| 2                 | 3.238340728              | 3       | 0.35631708 |
| 3                 | 3.238340728              | 3       | 0.35631708 |
| 4                 | 0.165159071              | 0       | NA         |

Frequentist Exponential Degree 5 Model with BMR of 1 Std.  
Dev. for the BMD and 0.95 Lower Confidence Limit for the  
BMDL

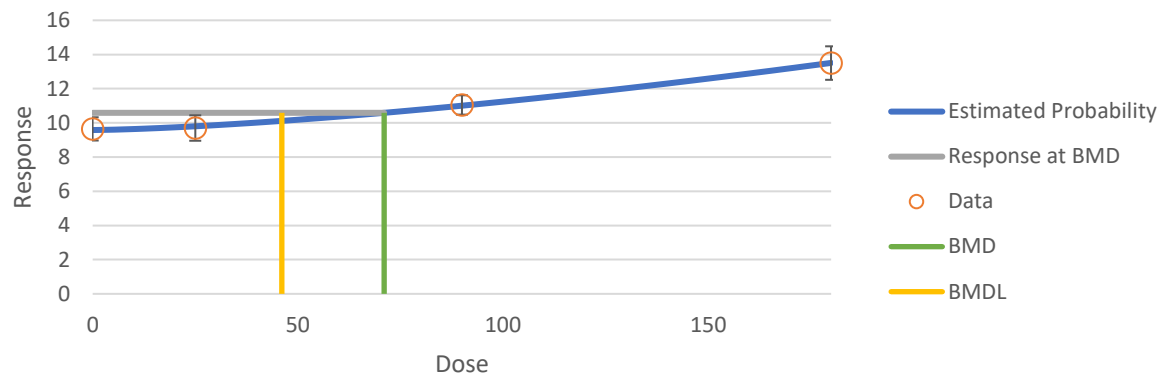

## Summary of Results

| Option set #1 (Hover for details)            |               |             |           |          |          |           |                |             |                                        |                      |                                                                        |
|----------------------------------------------|---------------|-------------|-----------|----------|----------|-----------|----------------|-------------|----------------------------------------|----------------------|------------------------------------------------------------------------|
| Model                                        | Analysis Type | Restriction | RiskType  | BMD      | BMDL     | BMDU      | Test 4 P-Value | AIC         | Unnormalized Log Posterior Probability | BMDS Recommendation  | BMDS Recommendation Notes                                              |
| <a href="#">Exponential 2 (CV - normal)*</a> | frequentist   | Restricted  | Std. Dev. | 52.15399 | 42.5823  | 67.221459 | 0.5235128      | 121.1737068 | -                                      | Viable - Recommended | Lowest AIC                                                             |
| <a href="#">Exponential 3 (CV - normal)</a>  | frequentist   | Restricted  | Std. Dev. | 70.43953 | 44.37955 | 107.30674 | 0.626264       | 122.1164805 | -                                      | Viable - Alternate   |                                                                        |
| <a href="#">Exponential 4 (CV - normal)</a>  | frequentist   | Restricted  | Std. Dev. | 46.66477 | 0        | Infinity  | 0.3092907      | 122.2262667 | -                                      | Unusable             | BMD computation failed<br>BMDL not estimated                           |
| <a href="#">Exponential 5 (CV - normal)</a>  | frequentist   | Restricted  | Std. Dev. | 71.04215 | 46.10052 | 106.3789  | NA             | 124.0444783 | -                                      | Questionable         | d.f.=0, saturated model<br>(Goodness of fit test cannot be calculated) |

\*Constant variance case presented (BMDS Test 2 p-value = 0.35631707542798), with the selected model in bold; scaled residuals for selected model for doses 0, 25, 90, 180 were 0.796188879956889, -0.524082712364853, -0.536962602419896, 0.277713070349884 [units], respectively.



Model Summary with BMR of 1 Std. Dev. for the BMD and 0.95 Lower  
Confidence Limit for the BMDL

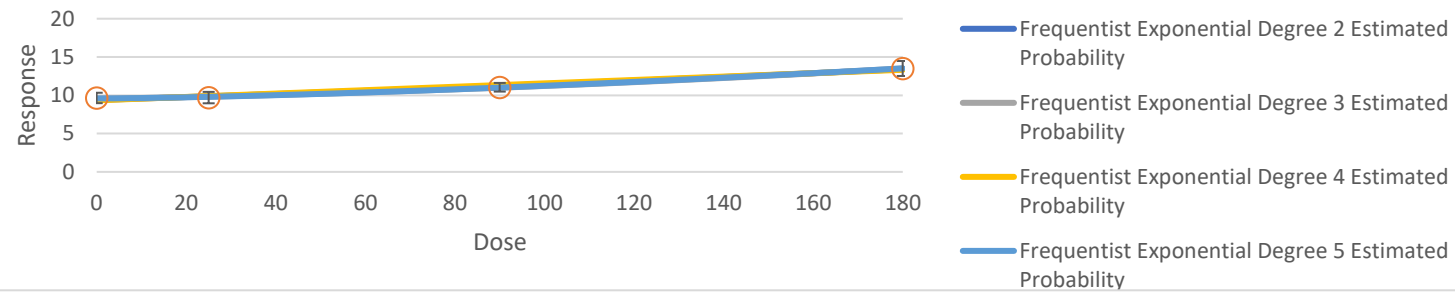

Supplement: s1 [file s1]
